# Supplementary material for: Inorganic benzenes with inverted singlet-triplet gaps
Source: Research Square preprint supplement (doi:10.21203/rs.3.rs-8056562/v1), 2025-12-25
Supplement: Supplementary file 1 [file 526be62e7ea3d88dadf09310.docx]

*Supplementary Information for*

**Inorganic benzenes with inverted singlet-triplet gaps**

Katsuyuki Shizu1, Kuraudo Ishihara1, Hiroki Uratani2, Hironori Kaji1*

1*Institute for Chemical Research, Kyoto University, Uji, Kyoto 611-0011, Japan*

2*Department of Molecular Engineering, Graduate School of Engineering, Kyoto University, Kyoto, 615-8510, Japan*


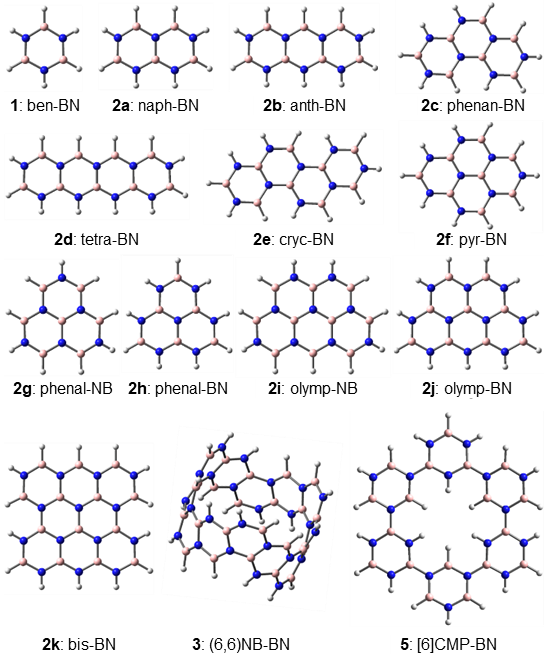


**Supplementary Fig. 1 |** Molecular structures of borazines **1: ben-BN - 2k: bis-BN**, **3: (6, 6)NB-BN**, and **5: [6]CMP-BN** optimized at the PBE0/6-31G(d) level of the theory.


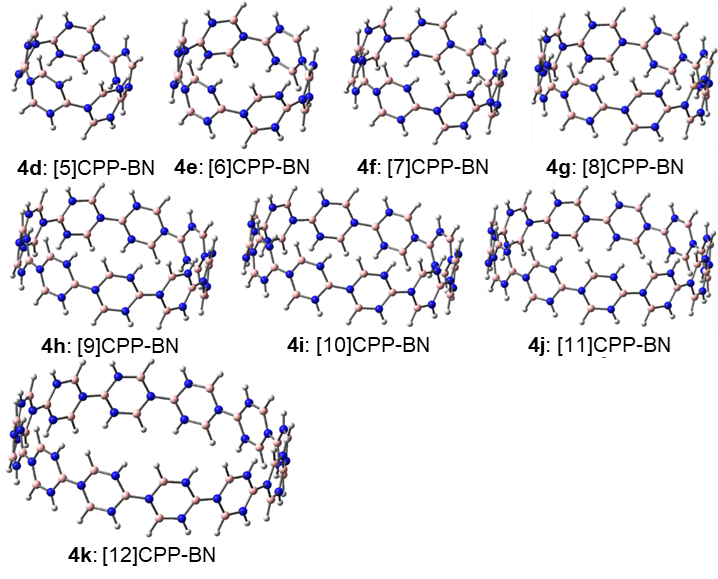


**Supplementary Fig. 2 |** Molecular structures of cycloparaphenylene-type borazine rings (**4d: [5]CPP-BN** - **4k: [12]CPP-BN**) optimized at the PBE0/6-31G(d) level of the theory.


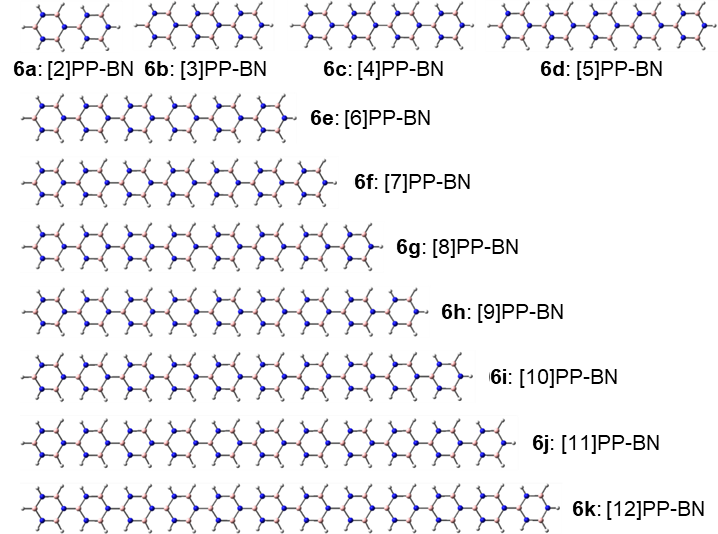


**Supplementary Fig. 3 |** Molecular structures of paraphenylene-type borazines (**6a: [2]PP-BN** - **6k: [12]PP-BN**) optimized at the PBE0/6-31G(d) level of the theory.


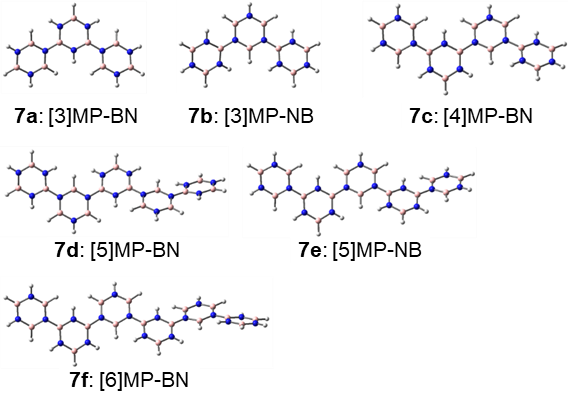


**Supplementary Fig. 4 |** Molecular structures of metaphenylene-type borazines (**7a: [3]MP-BN** - **7e: [6]MP-BN**) optimized at the PBE0/6-31G(d) level of the theory.


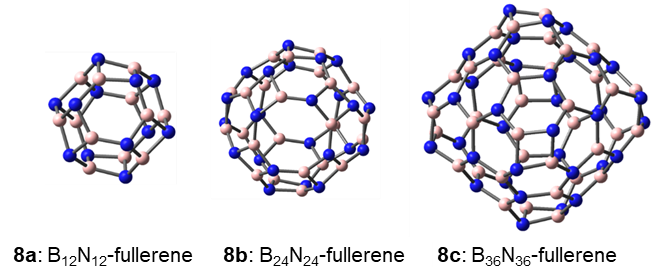


**Supplementary Fig. 5 |** Molecular structures of fullerenes-type borazines (**8a: B12N12-fullerene** - **8c: B36N36-fullerene**) optimized at the PBE0/6-31G(d) level of the theory.


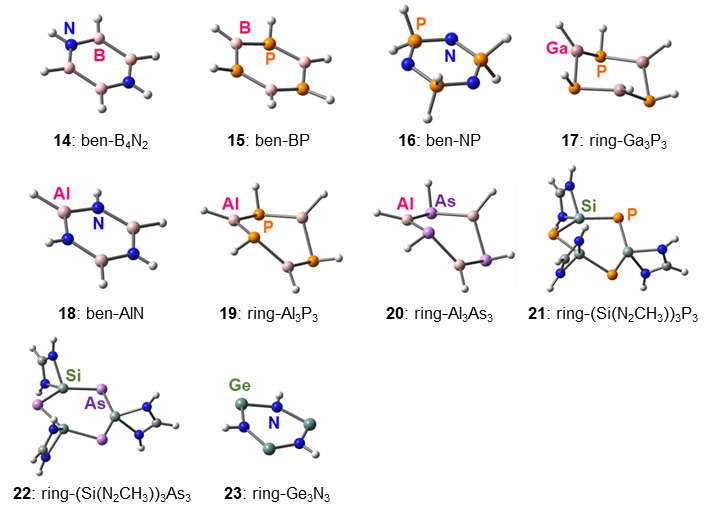


**Supplementary Fig. 6 |** Molecular structures of inorganic-type benzenes and cyclohexanes other than borazines (**14: ben-B4N2** - **23: ring-Ge3N3**) optimized at the PBE0/6-31G(d) level of the theory.

**Supplementary Table 1 | Calculated data for inorganic-type benzenes, 1, 2a-k, 3, 4e, 5, 6e, 7f, 8a, and 9-11.** Δ*E*ST, *E*(S1) and *E*(T1) are calculated with the SCS-CC2/cc-pVTZ//PBE0/6-31G(d) and ADC(2)/cc-pVTZ//PBE0/6-31G(d) methods. *μ*, *f*, and *k*F are calculated with the SCS-CC2/cc-pVTZ//PBE0/6-31G(d) method.

|  |  |  | SCS-CC2 |  |  |  |  |  |  | ADC(2) |  |  |
| --- | --- | --- | --- | --- | --- | --- | --- | --- | --- | --- | --- | --- |
|  | Molecular formula | Point  group | Δ*E*ST (meV) | *E*(S1) (eV) | *E*(T1) (eV) | *μ* (au) | *f* | *k*F (s−1) |  | Δ*E*ST (meV) | *E*(S1) (eV) | *E*(T1) (eV) |
| **1**: ben-BN | B3N3H6 | *D3h* | −295 | 6.83 | 7.13 | 0.0000 | 0.0 | 0.0 |  | −193 | 6.76 | 6.96 |
| **2a**: naph-BN | B5N5H8 | *C2v* | −95 | 6.64 | 6.73 | 0.1502 | 3.7×10−3 | 7.0×106 |  | 34 | 6.52 | 6.48 |
| **2b**: anth-BN | B7N7H10 | *C2v* | −21 | 6.63 | 6.65 | 0.4159 | 2.8×10−2 | 5.4×107 |  | 106 | 6.48 | 6.38 |
| **2c**: phenan-BN | B7N 7H10 | *Cs* | −127 | 6.57 | 6.70 | 0.2990 | 1.4×10−2 | 2.7×107 |  | −21 | 6.42 | 6.44 |
| **2d**: tetra-BN | B9N9H12 | *C2v* | −51 | 6.62 | 6.67 | 0.7023 | 8.0×10−2 | 1.5×108 |  | 30 | 6.42 | 6.39 |
| **2e**: cryc-BN | B9N9H12 | *Cs* | −59 | 6.56 | 6.62 | 0.1300 | 2.7×10−3 | 5.1×106 |  | 47 | 6.40 | 6.35 |
| **2f**: pyr-BN | B8N8H10 | *C2v* | −221 | 6.54 | 6.76 | 0.0562 | 5.1×10−4 | 9.4×105 |  | −115 | 6.39 | 6.50 |
| **2g**: phenal-NB | B7N6H9 | *D3h* | −260 | 6.59 | 6.85 | 0.0000 | 0.0 | 4.3×105 |  | −130 | 6.46 | 6.59 |
| **2h**: phenal-BN | B6N7H9 | *D3h* | −128 | 6.54 | 6.67 | 0.0000 | 0.0 | 3.8×105 |  | −34 | 6.39 | 6.43 |
| **2i**: olymp-NB | B10N9H11 | *C2v* | −243 | 6.54 | 6.78 | 0.0284 | 1.3×10−4 | 2.4×105 |  | −124 | 6.39 | 6.51 |
| **2j**: olymp-BN | B9N10H11 | *C2v* | −97 | 6.53 | 6.63 | 0.2545 | 1.0×10−2 | 1.9×107 |  | −49 | 6.37 | 6.42 |
| **2k**: bis-BN | B14N14H14 | *C2v* | −57 | 6.54 | 6.59 | 0.2110 | 7.1×10−3 | 1.3×107 |  | 51 | 6.34 | 6.29 |
| **3**: (6, 6)NB-BN | B24N24H24 | *S6* | −141 | 6.26 | 6.40 | 0.0000 | 0.0 | 0.0 |  | −54 | 6.02 | 6.08 |
| **4e**: [6]CPP-BN | B18N18H24 | *S6* | −145 | 6.26 | 6.40 | 0.0000 | 0.0 | 0.0 |  | −70 | 6.04 | 6.11 |
| **5**: [6]CMP-BN | B18N18H24 | *C3v* | −186 | 6.45 | 6.64 | 0.0000 | 0.0 | 0.0 |  | −75 | 6.28 | 6.35 |
| **6e**: [6]PP-BN | B18N18H26 | *C2* | −77 | 6.58 | 6.66 | 0.0458 | 3.4×10−4 | 6.4×105 |  | 35 | 6.42 | 6.38 |
| **7f**: [6]MP-BN | B18N18H26 | *C1* | −214 | 6.49 | 6.70 | 0.0556 | 4.9×10−4 | 9.0×105 |  | −78 | 6.35 | 6.43 |
| **8a**: B12N12-fullerene | B12N12 | *Th* | −134 | 6.47 | 6.60 | 0.0000 | 0.0 | 0.0 |  | −79 | 6.12 | 6.20 |
| **9**: ben-BS | B3S3H3 | *D3h* | −109 | 5.02 | 5.13 | 0.0000 | 0.0 | 0.0 |  | 26 | 4.93 | 4.91 |
| **10**: ben-BSe | B3Se3H3 | *D3h* | −160 | 4.42 | 4.58 | 0.0000 | 0.0 | 0.0 |  | −47 | 4.30 | 4.34 |
| **11**: ben-BO | B3O3H3 | *D3h* | 326 | 8.11 | 7.79 | 0.0000 | 0.0 | 0.0 |  | 279 | 7.78 | 7.50 |
| **12**: ben-GaN | Ga3N3H6 | *D3h* | −230 | 5.52 | 5.75 | 0.0000 | 0.0 | 0.0 |  | −160 | 5.37 | 5.53 |
| **13**: prism-GaN | Ga3N3H6 | *Cs* | 507 | 4.11 | 3.61 | 0.7097 | 5.1×10−2 | 3.7×107 |  | 518 | 3.95 | 3.43 |

**Supplementary Table 2 | Calculated data for inorganic-type benzenes, 4d-k, 6a-k, 7a-f, and 8a-c.** Δ*E*ST, *E*(S1) and *E*(T1) are calculated with the SCS-CC2/cc-pVTZ//PBE0/6-31G(d) and ADC(2)/cc-pVTZ//PBE0/6-31G(d) methods. *μ*, *f*, and *k*F are calculated with the SCS-CC2/cc-pVTZ//PBE0/6-31G(d) method. For **6i**-**k**, *μ*, *f*, and *k*F were not obtained at the SCS-CC2/cc-pVTZ level, because the electronic state calculations failed to converge.

|  |  |  | SCS-CC2 |  |  |  |  |  |  | ADC(2) |  |  |
| --- | --- | --- | --- | --- | --- | --- | --- | --- | --- | --- | --- | --- |
|  | Molecular Formula | Point  group | Δ*E*ST (meV) | *E*(S1) (eV) | *E*(T1) (eV) | *μ* (au) | *f* | *k*F (s−1) |  | Δ*E*ST (meV) | *E*(S1) (eV) | *E*(T1) (eV) |
| **4d**: [5]CPP-BN | B15N15H20 | *C5h* | −133 | 6.18 | 6.32 | 0.0000 | 0.0 | 0.0 |  | −61 | 5.96 | 6.02 |
| **4e**: [6]CPP-BN | B18N18H24 | *S6* | −145 | 6.26 | 6.40 | 0.0000 | 0.0 | 0.0 |  | −70 | 6.04 | 6.11 |
| **4f**: [7]CPP-BN | B21N21H28 | *C7h* | −148 | 6.31 | 6.45 | 0.0000 | 0.0 | 0.0 |  | −73 | 6.10 | 6.17 |
| **4g**: [8]CPP-BN | B24N24H32 | *C8h* | −148 | 6.34 | 6.49 | 0.0000 | 0.0 | 0.0 |  | −72 | 6.13 | 6.20 |
| **4h**: [9]CPP-BN | B27N27H36 | *C9h* | −147 | 6.37 | 6.51 | 0.0000 | 0.0 | 0.0 |  | −71 | 6.16 | 6.23 |
| **4i**: [10]CPP-BN | B30N30H40 | *C10h* | −146 | 6.39 | 6.53 | 0.0000 | 0.0 | 0.0 |  | −70 | 6.18 | 6.25 |
| **4j**: [11]CPP-BN | B33N33H44 | *CS* | −145 | 6.40 | 6.55 | 0.0007 | 7.0×10−8 | 6.8×102 |  | −70 | 6.19 | 6.26 |
| **4k**: [12]CPP-BN | B36N36H48 | *S12* | −144 | 6.41 | 6.56 | 0.0000 | 0.0 | 0.0 |  | −69 | 6.21 | 6.28 |
| **6a**: [2]PP-BN | B6N6H10 | *C2* | −156 | 6.65 | 6.81 | 0.1295 | 2.7×10−3 | 5.2×106 |  | −23 | 6.54 | 6.56 |
| **6b**: [3]PP-BN | B9N9H14 | *C2* | −109 | 6.61 | 6.72 | 0.0491 | 3.9×10−4 | 7.4×105 |  | 12 | 6.47 | 6.46 |
| **6c**: [4]PP-BN | B12N12H18 | *C2* | −94 | 6.60 | 6.69 | 0.0727 | 8.5×10−4 | 1.6×106 |  | 21 | 6.44 | 6.42 |
| **6d**: [5]PP-BN | B15N15H22 | *C2* | −84 | 6.59 | 6.67 | 0.0156 | 3.9×10−5 | 7.4×104 |  | 28 | 6.43 | 6.40 |
| **6e**: [6]PP-BN | B18N18H26 | *C2* | −77 | 6.58 | 6.66 | 0.1334 | 2.9×10−3 | 5.5×106 |  | 35 | 6.42 | 6.38 |
| **6f**: [7]PP-BN | B21N21H30 | *C2* | −71 | 6.58 | 6.65 | 0.0089 | 1.3×10−5 | 2.4×104 |  | 39 | 6.41 | 6.37 |
| **6g**: [8]PP-BN | B24N24H34 | *C2* | −67 | 6.58 | 6.64 | 0.0360 | 2.1×10−4 | 3.9×105 |  | 21 | 6.39 | 6.37 |
| **6h**: [9]PP-BN | B27N27H38 | *C2* | −64 | 6.58 | 6.64 | 0.0198 | 6.3×10−5 | 1.2×105 |  | 8 | 6.37 | 6.36 |
| **6i**: [10]PP-BN | B30N30H42 | *C2* | −63 | 6.57 | 6.64 | − | − | − |  | −3 | 6.37 | 6.36 |
| **6j**: [11]PP-BN | B33N33H46 | *C2* | −73 | 6.56 | 6.63 | − | − | − |  | −11 | 6.35 | 6.36 |
| **6k**: [12]PP-BN | B36N36H50 | *C2* | −81 | 6.56 | 6.63 | − | − | − |  | −17 | 6.34 | 6.36 |
| **7a**: [3]MP-BN | B9N9H14 | *C2* | −127 | 6.64 | 6.77 | 0.2572 | 1.1×10−2 | 2.1×107 |  | 6 | 6.52 | 6.51 |
| **7b**: [3]MP-NB | B9N9H14 | *C2* | −217 | 6.50 | 6.72 | 0.1042 | 1.7×10−3 | 3.2×106 |  | −101 | 6.35 | 6.45 |
| **7c**: [4]MP-BN | B12N12H18 | *C1* | −222 | 6.50 | 6.72 | 0.0812 | 1.0×10−3 | 1.9×106 |  | −100 | 6.35 | 6.45 |
| **7d**: [5]MP-BN | B15N15H22 | *C2* | −227 | 6.49 | 6.72 | 0.1110 | 2.0×10−3 | 3.6×106 |  | −110 | 6.34 | 6.45 |
| **7e**: [5]MP-NB | B15N15H22 | *C2* | −210 | 6.49 | 6.70 | 0.0398 | 2.5×10−4 | 4.6×105 |  | −87 | 6.34 | 6.43 |
| **7f**: [6]MP-BN | B18N18H26 | *C1* | −214 | 6.49 | 6.70 | 0.0556 | 4.9×10−4 | 9.0×105 |  | −79 | 6.35 | 6.43 |
| **8a**: B12N12-fullerene | B12N12 | *Th* | −134 | 6.47 | 6.60 | 0.0000 | 0.0 | 0.0 |  | −79 | 6.12 | 6.20 |
| **8b**: B24N24-fullerene | B24N24 | *O* | 27 | 5.87 | 5.84 | 0.0000 | 0.0 | 0.0 |  | 30 | 5.39 | 5.36 |
| **8c**: B36N36-fullerene | B36N36 | *Td* | 28 | 6.11 | 6.08 | 0.0004 | 6.2×10−5 | 1.0×105 |  | 27 | 5.61 | 5.58 |

**Supplementary Table 3 | Calculated data for inorganic-type benzenes, 9-23.** Δ*E*ST, *E*(S1) and *E*(T1) are calculated with the SCS-CC2/cc-pVTZ//PBE0/6-31G(d) and ADC(2)/cc-pVTZ//PBE0/6-31G(d) methods. *μ*, *f*, and *k*F are calculated with the SCS-CC2/cc-pVTZ//PBE0/6-31G(d) method.

|  |  |  | SCS-CC2 |  |  |  |  |  |  | ADC(2) |  |  | |
| --- | --- | --- | --- | --- | --- | --- | --- | --- | --- | --- | --- | --- | --- |
|  | Molecular Formula | Point  group | Δ*E*ST (meV) | *E*(S1) (eV) | *E*(T1) (eV) | *μ* (au) | *f* | *k*F (s−1) |  | Δ*E*ST (meV) | *E*(S1) (eV) | *E*(T1) (eV) |
| **9**: ben-BS | B3S3H3 | *D3h* | −109 | 5.02 | 5.13 | 0.0000 | 0.0 | 0.0 |  | 26 | 4.93 | 4.91 |
| **10**: ben-BSe | B3Se3H3 | *D3h* | −160 | 4.42 | 4.58 | 0.0000 | 0.0 | 0.0 |  | −47 | 4.30 | 4.34 |
| **11**: ben-BO | B3O3H3 | *D3h* | 326 | 8.11 | 7.79 | 0.0000 | 0.0 | 0.0 |  | 279 | 7.78 | 7.50 |
| **12**: ben-GaN | Ga3N3H6 | *D3h* | −230 | 5.52 | 5.75 | 0.0000 | 0.0 | 0.0 |  | −160 | 5.37 | 5.53 |
| **13**: prism-GaN | Ga3N3H6 | *Cs* | 507 | 4.11 | 3.61 | 0.7097 | 5.1×10−2 | 3.7×107 |  | 518 | 3.95 | 3.43 |
| **14**: ben-B4N2 | B4N2H6 | *D2h* | 613 | 4.23 | 3.62 | 0.0000 | 0.0 | 0.0 |  | 636 | 4.05 | 3.41 |
| **15**: ben-BP | B3P3H6 | *C3v* | 110 | 3.72 | 3.61 | 0.0000 | 0.0 | 0.0 |  | 227 | 3.70 | 3.47 |
| **16**: ben-NP | N3P3H6 | *D3h* | 174 | 6.84 | 6.67 | 0.0000 | 0.0 | 0.0 |  | 208 | 6.59 | 6.38 |
| **17**: ring-Ga3P3 | Ga3P3H6 | *C3v* | 610 | 4.38 | 3.77 | 0.7473 | 6.0×10−2 | 5.0×107 |  | 603 | 4.25 | 3.65 |
| **18**: ben-AlN | Al3N3H6 | *D3h* | 194 | 6.12 | 5.93 | 0.0000 | 0.0 | 0.0 |  | 251 | 6.01 | 5.76 |
| **19**: ring-Al3P3 | Al3P3H6 | *Cs* | 493 | 4.69 | 4.19 | 0.2229 | 5.7×10−3 | 5.4×106 |  | 508 | 4.61 | 4.10 |
| **20**: ring-Al3As3 | Al3As3H6 | *Cs* | 452 | 4.42 | 3.96 | 0.4043 | 1.8×10−2 | 1.5×107 |  | 462 | 4.31 | 3.85 |
| **21**: ring-(Si(N2CH3))3P3 | Si3P3H3 | *Cs* | 102 | 4.01 | 3.90 | 0.2206 | 4.8×10−3 | 3.3×106 |  | 139 | 3.76 | 3.62 |
| **22**: ring-(Si(N2CH3))3As3 | Si3As3H3 | *Cs* | 127 | 4.00 | 3.87 | 0.0001 | 0.0 | 0.0 |  | 132 | 3.61 | 3.48 |
| **23**: ring-Ge3N3 | Ge3N3H3 | *D3h* | 1081 | 3.92 | 2.84 | 1.1101 | 1.2×10−1 | 7.9×107 |  | 1128 | 3.81 | 2.69 |

**Supplementary Table 4 |** Nuclear coordinates of S0 geometry of **1: ben-BN** at the PBE0/6-31G(d) level of theory.

| Element Symbol | (Å) | (Å) | (Å) |
| --- | --- | --- | --- |
| N | 0.000000 | 1.407318 | 0.000000 |
| H | 0.000000 | 2.416612 | 0.000000 |
| N | 1.218774 | -0.703659 | 0.000000 |
| H | 2.092847 | -1.208306 | 0.000000 |
| N | -1.218774 | -0.703659 | 0.000000 |
| H | -2.092847 | -1.208306 | 0.000000 |
| B | 1.253408 | 0.723655 | 0.000000 |
| H | 2.292570 | 1.323616 | 0.000000 |
| B | -1.253408 | 0.723655 | 0.000000 |
| H | -2.292570 | 1.323616 | 0.000000 |
| B | 0.000000 | -1.447311 | 0.000000 |
| H | 0.000000 | -2.647232 | 0.000000 |

**Supplementary Table 5 |** Nuclear coordinates of S0 geometry of **2a: naph-BN** at the PBE0/6-31G(d) level of theory.

| Element Symbol | (Å) | (Å) | (Å) |
| --- | --- | --- | --- |
| B | 0.000000 | 1.251777 | 1.459668 |
| N | 0.000000 | 0.000000 | 0.744317 |
| B | 0.000000 | -1.251777 | 1.459668 |
| B | 0.000000 | 0.000000 | -0.709957 |
| N | 0.000000 | -1.261720 | -1.397079 |
| B | 0.000000 | -2.507648 | -0.710363 |
| N | 0.000000 | -2.467973 | 0.718731 |
| N | 0.000000 | 2.467973 | 0.718731 |
| B | 0.000000 | 2.507648 | -0.710363 |
| N | 0.000000 | 1.261720 | -1.397079 |
| H | 0.000000 | 3.548248 | -1.308319 |
| H | 0.000000 | 3.339176 | 1.228458 |
| H | 0.000000 | 1.268652 | 2.658560 |
| H | 0.000000 | -1.268652 | 2.658560 |
| H | 0.000000 | -3.339176 | 1.228458 |
| H | 0.000000 | -3.548248 | -1.308319 |
| H | 0.000000 | -1.277313 | -2.407010 |
| H | 0.000000 | 1.277313 | -2.407010 |

**Supplementary Table 6 |** Nuclear coordinates of S0 geometry of **2b: anth-BN** at the PBE0/6-31G(d) level of theory.

| Element Symbol | (Å) | (Å) | (Å) |
| --- | --- | --- | --- |
| B | 0.000000 | 2.498899 | -1.467212 |
| H | 0.000000 | 2.510761 | -2.665555 |
| B | 0.000000 | 0.000000 | -1.458884 |
| H | 0.000000 | 0.000000 | -2.656463 |
| B | 0.000000 | -2.498899 | -1.467212 |
| H | 0.000000 | -2.510761 | -2.665555 |
| B | 0.000000 | 3.763164 | 0.697815 |
| H | 0.000000 | 4.806100 | 1.291366 |
| B | 0.000000 | 1.255135 | 0.709193 |
| B | 0.000000 | -1.255135 | 0.709193 |
| B | 0.000000 | -3.763164 | 0.697815 |
| H | 0.000000 | -4.806100 | 1.291366 |
| N | 0.000000 | 2.520291 | 1.390656 |
| H | 0.000000 | 2.541489 | 2.400440 |
| N | 0.000000 | 0.000000 | 1.398152 |
| H | 0.000000 | 0.000000 | 2.409010 |
| N | 0.000000 | -2.520291 | 1.390656 |
| H | 0.000000 | -2.541489 | 2.400440 |
| N | 0.000000 | 3.718187 | -0.731077 |
| H | 0.000000 | 4.587596 | -1.243772 |
| N | 0.000000 | 1.249682 | -0.745872 |
| N | 0.000000 | -1.249682 | -0.745872 |
| N | 0.000000 | -3.718187 | -0.731077 |
| H | 0.000000 | -4.587596 | -1.243772 |

**Supplementary Table 7 |** Nuclear coordinates of S0 geometry of **2c: phenan-BN** at the PBE0/6-31G(d) level of theory.

| Element Symbol | (Å) | (Å) | (Å) |
| --- | --- | --- | --- |
| H | -3.123862 | 2.160758 | 0.000000 |
| H | -2.210762 | -2.652564 | 0.000000 |
| H | 2.415011 | -3.946243 | 0.000000 |
| H | -0.103561 | -4.005461 | 0.000000 |
| H | 2.654607 | 0.229059 | 0.000000 |
| H | 3.969367 | -1.927964 | 0.000000 |
| H | -3.194964 | -0.353248 | 0.000000 |
| H | -1.982673 | 4.419324 | 0.000000 |
| H | 0.551285 | 4.146482 | 0.000000 |
| H | 1.926403 | 2.083470 | 0.000000 |
| B | -1.409333 | 3.365520 | 0.000000 |
| B | -1.452244 | 0.856766 | 0.000000 |
| B | 0.724877 | 2.054903 | 0.000000 |
| B | -1.555012 | -1.648862 | 0.000000 |
| B | 0.669755 | -0.485148 | 0.000000 |
| B | 0.541731 | -2.994580 | 0.000000 |
| B | 2.770725 | -1.864818 | 0.000000 |
| N | -2.114346 | 2.132400 | 0.000000 |
| N | 0.018202 | 3.289639 | 0.000000 |
| N | 0.000000 | 0.812460 | 0.000000 |
| N | -2.185256 | -0.378230 | 0.000000 |
| N | -0.115109 | -1.709927 | 0.000000 |
| N | 2.097315 | -0.612681 | 0.000000 |
| N | 1.963002 | -3.044020 | 0.000000 |

**Supplementary Table 8 |** Nuclear coordinates of S0 geometry of **2d: tetra-BN** at the PBE0/6-31G(d) level of theory.

| Element Symbol | (Å) | (Å) | (Å) |
| --- | --- | --- | --- |
| B | 0.000000 | 3.745999 | 1.475837 |
| H | 0.000000 | 3.753296 | 2.674107 |
| B | 0.000000 | 1.247026 | 1.457438 |
| H | 0.000000 | 1.242148 | 2.654515 |
| B | 0.000000 | -1.247026 | 1.457438 |
| H | 0.000000 | -1.242148 | 2.654515 |
| B | 0.000000 | 5.018612 | -0.684256 |
| H | 0.000000 | 6.063663 | -1.274122 |
| B | 0.000000 | 2.510752 | -0.705234 |
| B | 0.000000 | 0.000000 | -0.717886 |
| B | 0.000000 | -2.510752 | -0.705234 |
| N | 0.000000 | 3.778190 | -1.382035 |
| H | 0.000000 | 3.803467 | -2.391688 |
| N | 0.000000 | 1.258666 | -1.400253 |
| H | 0.000000 | 1.265392 | -2.411054 |
| N | 0.000000 | -1.258666 | -1.400253 |
| H | 0.000000 | -1.265392 | -2.411054 |
| N | 0.000000 | 4.968308 | 0.744193 |
| H | 0.000000 | 5.835775 | 1.260157 |
| N | 0.000000 | 2.499853 | 0.749537 |
| N | 0.000000 | 0.000000 | 0.738225 |
| H | 0.000000 | -5.835775 | 1.260157 |
| H | 0.000000 | -3.803467 | -2.391688 |
| B | 0.000000 | -3.745999 | 1.475837 |
| H | 0.000000 | -3.753296 | 2.674107 |
| B | 0.000000 | -5.018612 | -0.684256 |
| H | 0.000000 | -6.063663 | -1.274122 |
| N | 0.000000 | -2.499853 | 0.749537 |
| N | 0.000000 | -4.968308 | 0.744193 |
| N | 0.000000 | -3.778190 | -1.382035 |

**Supplementary Table 9 |** Nuclear coordinates of S0 geometry of **2e: cryc-BN** at the PBE0/6-31G(d) level of theory.

| Element Symbol | (Å) | (Å) | (Å) |
| --- | --- | --- | --- |
| H | 4.625097 | -0.881071 | 0.000000 |
| H | 1.270920 | 2.650144 | 0.000000 |
| H | -1.251606 | -2.415816 | 0.000000 |
| H | -3.530474 | -1.386384 | 0.000000 |
| H | 3.306481 | 1.270691 | 0.000000 |
| H | 4.894333 | -3.397760 | 0.000000 |
| H | 2.616818 | -4.544208 | 0.000000 |
| H | 0.345840 | -3.562518 | 0.000000 |
| B | 3.840673 | -2.825031 | 0.000000 |
| B | 2.512947 | -0.698397 | 0.000000 |
| B | 1.336001 | -2.882702 | 0.000000 |
| B | 1.226209 | 1.449660 | 0.000000 |
| B | 0.000000 | -0.719761 | 0.000000 |
| B | -2.513977 | -0.750605 | 0.000000 |
| N | 3.762423 | -1.406377 | 0.000000 |
| N | 2.600445 | -3.535063 | 0.000000 |
| N | 1.268483 | -1.444930 | 0.000000 |
| N | 2.449997 | 0.735439 | 0.000000 |
| N | -0.021417 | 0.735222 | 0.000000 |
| N | -1.257350 | -1.406353 | 0.000000 |
| N | -2.547585 | 0.689268 | 0.000000 |
| H | -0.541203 | 3.407998 | 0.000000 |
| H | -2.661037 | 4.774154 | 0.000000 |
| H | -4.719729 | 3.273478 | 0.000000 |
| H | -4.841360 | 0.756026 | 0.000000 |
| B | -1.302660 | 1.438261 | 0.000000 |
| B | -2.629566 | 3.574217 | 0.000000 |
| B | -3.815573 | 1.376122 | 0.000000 |
| N | -1.394736 | 2.869645 | 0.000000 |
| N | -3.829453 | 2.798356 | 0.000000 |

**Supplementary Table 10 |** Nuclear coordinates of S0 geometry of **2f: pyr-BN** at the PBE0/6-31G(d) level of theory.

| Element Symbol | (Å) | (Å) | (Å) |
| --- | --- | --- | --- |
| B | 0.000000 | 1.253173 | 2.911643 |
| N | 0.000000 | 1.257196 | 1.472699 |
| B | 0.000000 | 2.505660 | 0.748251 |
| B | 0.000000 | 0.000000 | 0.745241 |
| N | 0.000000 | 0.000000 | -0.698383 |
| B | 0.000000 | 1.252120 | -1.424667 |
| N | 0.000000 | 2.476272 | -0.670074 |
| N | 0.000000 | 0.000000 | 3.590451 |
| B | 0.000000 | -1.253173 | 2.911643 |
| N | 0.000000 | -1.257196 | 1.472699 |
| B | 0.000000 | -2.505660 | 0.748251 |
| N | 0.000000 | -2.476272 | -0.670074 |
| B | 0.000000 | -1.252120 | -1.424667 |
| N | 0.000000 | -1.219556 | -2.859488 |
| B | 0.000000 | 0.000000 | -3.596984 |
| N | 0.000000 | 1.219556 | -2.859488 |
| H | 0.000000 | -3.360382 | -1.158556 |
| H | 0.000000 | -2.086629 | -3.376935 |
| H | 0.000000 | 0.000000 | -4.797164 |
| H | 0.000000 | 2.086629 | -3.376935 |
| H | 0.000000 | 0.000000 | 4.600117 |
| H | 0.000000 | 2.281533 | 3.527647 |
| H | 0.000000 | 3.550898 | 1.335389 |
| H | 0.000000 | 3.360382 | -1.158556 |
| H | 0.000000 | -3.550898 | 1.335389 |
| H | 0.000000 | -2.281533 | 3.527647 |

**Supplementary Table 11 |** Nuclear coordinates of S0 geometry of **2g: phenal-NB** at the PBE0/6-31G(d) level of theory.

| Element Symbol | (Å) | (Å) | (Å) |
| --- | --- | --- | --- |
| B | 1.249868 | 2.168447 | 0.000000 |
| N | 0.000000 | 1.450864 | 0.000000 |
| B | -1.249868 | 2.168447 | 0.000000 |
| B | 0.000000 | 0.000000 | 0.000000 |
| N | -1.256485 | -0.725432 | 0.000000 |
| B | -2.502864 | -0.001806 | 0.000000 |
| N | -2.463021 | 1.422026 | 0.000000 |
| N | 2.463021 | 1.422026 | 0.000000 |
| B | 2.502864 | -0.001806 | 0.000000 |
| N | 1.256485 | -0.725432 | 0.000000 |
| B | 1.252996 | -2.166641 | 0.000000 |
| N | 0.000000 | -2.844052 | 0.000000 |
| B | -1.252996 | -2.166641 | 0.000000 |
| H | 0.000000 | -3.854025 | 0.000000 |
| H | 2.281599 | -2.780974 | 0.000000 |
| H | 3.549193 | -0.585436 | 0.000000 |
| H | 3.337683 | 1.927012 | 0.000000 |
| H | 1.267594 | 3.366410 | 0.000000 |
| H | -1.267594 | 3.366410 | 0.000000 |
| H | -3.337683 | 1.927012 | 0.000000 |
| H | -3.549193 | -0.585436 | 0.000000 |
| H | -2.281599 | -2.780974 | 0.000000 |

**Supplementary Table 12 |** Nuclear coordinates of S0 geometry of **2h: phenal-BN** at the PBE0/6-31G(d) level of theory.

| Element Symbol | (Å) | (Å) | (Å) |
| --- | --- | --- | --- |
| N | 1.262129 | 2.136437 | 0.000000 |
| B | 0.000000 | 1.447659 | 0.000000 |
| N | -1.262129 | 2.136437 | 0.000000 |
| N | 0.000000 | 0.000000 | 0.000000 |
| B | -1.253709 | -0.723829 | 0.000000 |
| N | -2.481273 | 0.024817 | 0.000000 |
| B | -2.509838 | 1.449055 | 0.000000 |
| B | 2.509838 | 1.449055 | 0.000000 |
| N | 2.481273 | 0.024817 | 0.000000 |
| B | 1.253709 | -0.723829 | 0.000000 |
| N | 1.219144 | -2.161254 | 0.000000 |
| B | 0.000000 | -2.898111 | 0.000000 |
| N | -1.219144 | -2.161254 | 0.000000 |
| H | 0.000000 | -4.098191 | 0.000000 |
| H | 2.086509 | -2.678221 | 0.000000 |
| H | 3.362662 | -0.467860 | 0.000000 |
| H | 3.549138 | 2.049096 | 0.000000 |
| H | 1.276153 | 3.146081 | 0.000000 |
| H | -1.276153 | 3.146081 | 0.000000 |
| H | -3.549138 | 2.049096 | 0.000000 |
| H | -3.362662 | -0.467860 | 0.000000 |
| H | -2.086509 | -2.678221 | 0.000000 |

**Supplementary Table 13 |** Nuclear coordinates of S0 geometry of **2i: olymp-NB** at the PBE0/6-31G(d) level of theory.

| Element Symbol | (Å) | (Å) | (Å) |
| --- | --- | --- | --- |
| N | 0.000000 | 1.262579 | 2.728033 |
| B | 0.000000 | 0.000000 | 2.044653 |
| N | 0.000000 | -1.262579 | 2.728033 |
| N | 0.000000 | 0.000000 | 0.597326 |
| B | 0.000000 | -1.251883 | -0.121769 |
| N | 0.000000 | -2.509179 | 0.601171 |
| B | 0.000000 | -2.507132 | 2.044687 |
| B | 0.000000 | 2.507132 | 2.044687 |
| N | 0.000000 | 2.509179 | 0.601171 |
| B | 0.000000 | 1.251883 | -0.121769 |
| N | 0.000000 | 1.247230 | -1.573020 |
| B | 0.000000 | 0.000000 | -2.289264 |
| N | 0.000000 | -1.247230 | -1.573020 |
| B | 0.000000 | 3.752639 | -0.125096 |
| N | 0.000000 | 3.710169 | -1.549720 |
| B | 0.000000 | 2.496275 | -2.294418 |
| B | 0.000000 | -2.496275 | -2.294418 |
| N | 0.000000 | -3.710169 | -1.549720 |
| B | 0.000000 | -3.752639 | -0.125096 |
| H | 0.000000 | 0.000000 | -3.486273 |
| H | 0.000000 | 4.800847 | 0.455473 |
| H | 0.000000 | 4.583877 | -2.055982 |
| H | 0.000000 | 2.511621 | -3.491951 |
| H | 0.000000 | -2.511621 | -3.491951 |
| H | 0.000000 | -4.583877 | -2.055982 |
| H | 0.000000 | -4.800847 | 0.455473 |
| H | 0.000000 | 3.537196 | 2.656202 |
| H | 0.000000 | 1.280599 | 3.738011 |
| H | 0.000000 | -1.280599 | 3.738011 |
| H | 0.000000 | -3.537196 | 2.656202 |

**Supplementary Table 14 |** Nuclear coordinates of S0 geometry of **2j: olymp-BN** at the PBE0/6-31G(d) level of theory.

| Element Symbol | (Å) | (Å) | (Å) |
| --- | --- | --- | --- |
| B | 0.000000 | 1.249695 | -2.796936 |
| N | 0.000000 | 0.000000 | -2.079855 |
| B | 0.000000 | -1.249695 | -2.796936 |
| B | 0.000000 | 0.000000 | -0.625197 |
| N | 0.000000 | -1.252873 | 0.095692 |
| B | 0.000000 | -2.505782 | -0.626111 |
| N | 0.000000 | -2.464891 | -2.063321 |
| N | 0.000000 | 2.464891 | -2.063321 |
| B | 0.000000 | 2.505782 | -0.626111 |
| N | 0.000000 | 1.252873 | 0.095692 |
| B | 0.000000 | 1.255956 | 1.544830 |
| N | 0.000000 | 0.000000 | 2.233563 |
| B | 0.000000 | -1.255956 | 1.544830 |
| N | 0.000000 | 3.735114 | 0.117389 |
| B | 0.000000 | 3.766094 | 1.541645 |
| N | 0.000000 | 2.519794 | 2.230990 |
| N | 0.000000 | -2.519794 | 2.230990 |
| B | 0.000000 | -3.766094 | 1.541645 |
| N | 0.000000 | -3.735114 | 0.117389 |
| H | 0.000000 | 0.000000 | 3.244089 |
| H | 0.000000 | 4.614809 | -0.378140 |
| H | 0.000000 | 4.806937 | 2.140497 |
| H | 0.000000 | 2.536585 | 3.240492 |
| H | 0.000000 | -2.536585 | 3.240492 |
| H | 0.000000 | -4.806937 | 2.140497 |
| H | 0.000000 | -4.614809 | -0.378140 |
| H | 0.000000 | 3.329412 | -2.585639 |
| H | 0.000000 | 1.265887 | -3.996636 |
| H | 0.000000 | -1.265887 | -3.996636 |
| H | 0.000000 | -3.329412 | -2.585639 |

**Supplementary Table 15 |** Nuclear coordinates of S0 geometry of **2k: bis-BN** at the PBE0/6-31G(d) level of theory.

| Element Symbol | (Å) | (Å) | (Å) |
| --- | --- | --- | --- |
| N | 0.000000 | 1.244816 | -2.924689 |
| B | 0.000000 | 1.253414 | -1.470245 |
| N | 0.000000 | 0.000000 | -0.750618 |
| B | 0.000000 | -1.253414 | -1.470245 |
| N | 0.000000 | -1.244816 | -2.924689 |
| B | 0.000000 | 0.000000 | -3.639557 |
| B | 0.000000 | 0.000000 | 0.700812 |
| N | 0.000000 | -1.255642 | 1.416380 |
| B | 0.000000 | -2.513839 | 0.702514 |
| N | 0.000000 | -2.516616 | -0.758478 |
| N | 0.000000 | 2.516616 | -0.758478 |
| B | 0.000000 | 2.513839 | 0.702514 |
| N | 0.000000 | 1.255642 | 1.416380 |
| B | 0.000000 | 1.254970 | 2.869491 |
| N | 0.000000 | 0.000000 | 3.554601 |
| B | 0.000000 | -1.254970 | 2.869491 |
| B | 0.000000 | -3.740532 | -1.510243 |
| N | 0.000000 | -3.698312 | -2.932618 |
| B | 0.000000 | -2.479202 | -3.664983 |
| B | 0.000000 | 2.479202 | -3.664983 |
| N | 0.000000 | 3.698312 | -2.932618 |
| B | 0.000000 | 3.740532 | -1.510243 |
| N | 0.000000 | 3.726612 | 1.464587 |
| B | 0.000000 | 3.756525 | 2.887375 |
| N | 0.000000 | 2.508140 | 3.568996 |
| N | 0.000000 | -2.508140 | 3.568996 |
| B | 0.000000 | -3.756525 | 2.887375 |
| N | 0.000000 | -3.726612 | 1.464587 |
| H | 0.000000 | 0.000000 | -4.836617 |
| H | 0.000000 | 0.000000 | 4.565035 |
| H | 0.000000 | -4.814928 | -0.974003 |
| H | 0.000000 | -4.570780 | -3.440527 |
| H | 0.000000 | -2.480564 | -4.862474 |
| H | 0.000000 | 2.480564 | -4.862474 |
| H | 0.000000 | 4.570780 | -3.440527 |
| H | 0.000000 | 4.814928 | -0.974003 |
| H | 0.000000 | 4.605860 | 0.969754 |
| H | 0.000000 | 4.795608 | 3.488609 |
| H | 0.000000 | 2.513493 | 4.578555 |
| H | 0.000000 | -2.513493 | 4.578555 |
| H | 0.000000 | -4.795608 | 3.488609 |
| H | 0.000000 | -4.605860 | 0.969754 |

**Supplementary Table 16 |** Nuclear coordinates of S0 geometry of **3: (6, 6)NB-BN** at the PBE0/6-31G(d) level of theory.

| Element Symbol | (Å) | (Å) | (Å) |
| --- | --- | --- | --- |
| B | 0.000000 | 4.159835 | 0.020985 |
| B | -2.066101 | 3.647817 | -1.260611 |
| H | -2.630134 | 3.535081 | -2.316144 |
| B | -2.092197 | 3.614681 | 1.222106 |
| B | -3.612333 | 2.115018 | 2.491302 |
| H | -4.004971 | 1.684627 | 3.539095 |
| B | -3.602523 | 2.079917 | -0.020985 |
| B | -4.192152 | 0.034613 | 1.260611 |
| H | -4.376537 | -0.510223 | 2.316144 |
| B | -4.176504 | -0.004556 | -1.222106 |
| B | -3.602523 | -2.079917 | 0.020985 |
| B | -3.637826 | -2.070863 | -2.491302 |
| H | -3.461415 | -2.626094 | -3.539095 |
| B | -2.084307 | -3.619236 | 1.222106 |
| B | -2.126052 | -3.613204 | -1.260611 |
| H | -1.746402 | -4.045303 | -2.316144 |
| B | -0.025493 | -4.185881 | 2.491302 |
| H | 0.543556 | -4.310720 | 3.539095 |
| B | 0.000000 | -4.159835 | -0.020985 |
| B | 2.066101 | -3.647817 | 1.260611 |
| H | 2.630134 | -3.535081 | 2.316144 |
| B | 2.092197 | -3.614681 | -1.222106 |
| B | 3.602523 | -2.079917 | 0.020985 |
| B | 3.612333 | -2.115018 | -2.491302 |
| H | 4.004971 | -1.684627 | -3.539095 |
| B | 4.176504 | 0.004556 | 1.222106 |
| B | 4.192152 | -0.034613 | -1.260611 |
| H | 4.376537 | 0.510223 | -2.316144 |
| B | 3.637826 | 2.070863 | 2.491302 |
| H | 3.461415 | 2.626094 | 3.539095 |
| B | 3.602523 | 2.079917 | -0.020985 |
| B | 2.126052 | 3.613204 | 1.260611 |
| H | 1.746402 | 4.045303 | 2.316144 |
| B | 2.084307 | 3.619236 | -1.222106 |
| B | 0.025493 | 4.185881 | -2.491302 |
| H | -0.543556 | 4.310720 | -3.539095 |
| N | -0.802481 | 4.234757 | 1.208069 |
| H | -0.318811 | 4.326200 | 2.091501 |
| N | -0.714991 | 4.122390 | -1.249745 |
| N | -2.698471 | 3.214707 | -0.039327 |
| N | -2.767815 | 3.252935 | 2.444546 |
| H | -2.454721 | 3.642856 | 3.322439 |
| N | -3.927590 | 1.441995 | 1.249745 |
| N | -4.068648 | 1.422410 | -1.208069 |
| H | -3.906005 | 1.887001 | -2.091501 |
| N | -4.133253 | -0.729591 | 0.039327 |
| N | -4.201032 | -0.770530 | -2.444546 |
| H | -4.382167 | -0.304423 | -3.322439 |
| N | -3.212599 | -2.680396 | -1.249745 |
| N | -3.266167 | -2.812347 | 1.208069 |
| H | -3.587193 | -2.439199 | 2.091501 |
| N | -1.434782 | -3.944298 | -0.039327 |
| N | -1.433217 | -4.023466 | 2.444546 |
| H | -1.927445 | -3.947279 | 3.322439 |
| N | 0.714991 | -4.122390 | 1.249745 |
| N | 2.698471 | -3.214707 | 0.039327 |
| N | 0.802481 | -4.234757 | -1.208069 |
| H | 0.318811 | -4.326200 | -2.091501 |
| N | 2.767815 | -3.252935 | -2.444546 |
| H | 2.454721 | -3.642856 | -3.322439 |
| N | 3.927590 | -1.441995 | -1.249745 |
| N | 4.068648 | -1.422410 | 1.208069 |
| H | 3.906005 | -1.887001 | 2.091501 |
| N | 4.201032 | 0.770530 | 2.444546 |
| H | 4.382167 | 0.304423 | 3.322439 |
| N | 4.133253 | 0.729591 | -0.039327 |
| N | 3.212599 | 2.680396 | 1.249745 |
| N | 3.266167 | 2.812347 | -1.208069 |
| H | 3.587193 | 2.439199 | -2.091501 |
| N | 1.434782 | 3.944298 | 0.039327 |
| N | 1.433217 | 4.023466 | -2.444546 |
| H | 1.927445 | 3.947279 | -3.322439 |

**Supplementary Table 17 |** Nuclear coordinates of S0 geometry of **4d: [5]CPP-BN** at the PBE0/6-31G(d) level of theory.

| Element Symbol | (Å) | (Å) | (Å) |
| --- | --- | --- | --- |
| H | -3.612394 | 1.059571 | 2.293103 |
| H | -2.077122 | 2.988948 | -2.096937 |
| H | -3.612394 | 1.059571 | -2.293103 |
| H | 3.545288 | 1.266101 | 2.293103 |
| H | 3.437286 | -1.197208 | -2.096937 |
| H | -2.124003 | -3.108166 | -2.293103 |
| H | -2.077122 | 2.988948 | 2.096937 |
| H | 2.200792 | 2.899096 | -2.096937 |
| H | 2.299688 | -2.980523 | -2.293103 |
| H | -3.484524 | -1.051825 | 2.096937 |
| H | 3.437286 | -1.197208 | 2.096937 |
| H | -0.108580 | 3.763016 | -2.293103 |
| H | 3.545288 | 1.266101 | -2.293103 |
| H | -0.076432 | -3.639011 | -2.096937 |
| H | 2.200792 | 2.899096 | 2.096937 |
| H | -2.124003 | -3.108166 | 2.293103 |
| H | -3.484524 | -1.051825 | -2.096937 |
| H | -0.076432 | -3.639011 | 2.096937 |
| H | -0.108580 | 3.763016 | 2.293103 |
| H | 2.299688 | -2.980523 | 2.293103 |
| B | 3.157630 | -1.440970 | 0.000000 |
| B | 3.459446 | 0.701409 | 1.235025 |
| B | 3.459446 | 0.701409 | -1.235025 |
| B | 2.346206 | 2.557800 | 0.000000 |
| B | 0.401948 | 3.506876 | 1.235025 |
| B | 0.401948 | 3.506876 | -1.235025 |
| B | -1.707595 | 3.021778 | 0.000000 |
| B | -3.211029 | 1.465960 | 1.235025 |
| B | -3.211029 | 1.465960 | -1.235025 |
| B | -3.401557 | -0.690239 | 0.000000 |
| B | -2.386473 | -2.600863 | 1.235025 |
| B | -2.386473 | -2.600863 | -1.235025 |
| B | -0.394683 | -3.448369 | 0.000000 |
| B | 1.736107 | -3.073382 | 1.235025 |
| B | 1.736107 | -3.073382 | -1.235025 |
| N | 2.382558 | -2.668644 | 0.000000 |
| N | 3.471393 | -0.715116 | 1.209697 |
| N | 3.471393 | -0.715116 | -1.209697 |
| N | 3.274282 | 1.441291 | 0.000000 |
| N | 1.752835 | 3.080508 | 1.209697 |
| N | 1.752835 | 3.080508 | -1.209697 |
| N | -0.358941 | 3.559411 | 0.000000 |
| N | -2.388082 | 2.618975 | 1.209697 |
| N | -2.388082 | 2.618975 | -1.209697 |
| N | -3.496119 | 0.758546 | 0.000000 |
| N | -3.228751 | -1.461893 | 1.209697 |
| N | -3.228751 | -1.461893 | -1.209697 |
| N | -1.801780 | -3.090604 | 0.000000 |
| N | 0.392604 | -3.522474 | 1.209697 |
| N | 0.392604 | -3.522474 | -1.209697 |

**Supplementary Table 18 |** Nuclear coordinates of S0 geometry of **4e: [6]CPP-BN** at the PBE0/6-31G(d) level of theory.

| Element Symbol | (Å) | (Å) | (Å) |
| --- | --- | --- | --- |
| H | 1.016336 | -4.308008 | 2.295261 |
| H | -1.016497 | 4.308284 | 2.295210 |
| H | -4.155470 | -1.185559 | 2.096134 |
| H | -3.104637 | 3.006249 | 2.096087 |
| H | 3.104459 | -3.005963 | 2.096134 |
| H | -3.222676 | -3.034177 | -2.295261 |
| H | 3.222676 | 3.034177 | 2.295261 |
| H | -4.239012 | 1.273831 | 2.295261 |
| H | 1.051011 | 4.191522 | 2.096134 |
| H | -1.051011 | -4.191522 | -2.096134 |
| H | 4.239332 | -1.273829 | 2.295210 |
| H | 4.155806 | 1.185570 | 2.096087 |
| H | 1.016497 | -4.308284 | -2.295210 |
| H | -1.016336 | 4.308008 | -2.295261 |
| H | -4.155806 | -1.185570 | -2.096087 |
| H | -3.104459 | 3.005963 | -2.096134 |
| H | 3.104637 | -3.006249 | -2.096087 |
| H | -3.222835 | -3.034455 | 2.295210 |
| H | 3.222835 | 3.034455 | -2.295210 |
| H | -4.239332 | 1.273829 | -2.295210 |
| H | 1.051169 | 4.191818 | -2.096087 |
| H | -1.051169 | -4.191818 | 2.096087 |
| H | 4.239012 | -1.273831 | -2.295261 |
| H | 4.155470 | 1.185559 | -2.096134 |
| B | -4.167930 | 0.713122 | 1.233973 |
| B | -4.168094 | 0.713114 | -1.233933 |
| B | -3.923502 | -1.445813 | 0.000010 |
| B | -2.701622 | -3.253118 | 1.233933 |
| B | -2.701546 | -3.252972 | -1.233973 |
| B | -0.709640 | -4.120759 | -0.000010 |
| B | 1.466383 | -3.966094 | 1.233973 |
| B | 1.466472 | -3.966232 | -1.233933 |
| B | 3.213862 | -2.674946 | 0.000010 |
| B | 4.168094 | -0.713114 | 1.233933 |
| B | 4.167930 | -0.713122 | -1.233973 |
| B | 3.923502 | 1.445813 | -0.000010 |
| B | 2.701546 | 3.252972 | 1.233973 |
| B | 2.701622 | 3.253118 | -1.233933 |
| B | 0.709640 | 4.120759 | 0.000010 |
| B | -1.466472 | 3.966232 | 1.233933 |
| B | -1.466383 | 3.966094 | -1.233973 |
| B | -3.213862 | 2.674946 | -0.000010 |
| N | -0.742735 | 4.197997 | -0.000003 |
| N | -2.701622 | 3.272585 | 1.208964 |
| N | -2.701546 | 3.272461 | -1.209012 |
| N | -4.006940 | 1.455771 | 0.000003 |
| N | -4.184807 | -0.703378 | 1.209012 |
| N | -4.184952 | -0.703381 | -1.208964 |
| N | -3.264204 | -2.742226 | -0.000003 |
| N | -1.483330 | -3.975965 | 1.208964 |
| N | -1.483261 | -3.975838 | -1.209012 |
| N | 0.742735 | -4.197997 | 0.000003 |
| N | 2.701546 | -3.272461 | 1.209012 |
| N | 2.701622 | -3.272585 | -1.208964 |
| N | 4.006940 | -1.455771 | -0.000003 |
| N | 4.184952 | 0.703381 | 1.208964 |
| N | 4.184807 | 0.703378 | -1.209012 |
| N | 3.264204 | 2.742226 | 0.000003 |
| N | 1.483261 | 3.975838 | 1.209012 |
| N | 1.483330 | 3.975965 | -1.208964 |

**Supplementary Table 19 |** Nuclear coordinates of S0 geometry of **4f: [7]CPP-BN** at the PBE0/6-31G(d) level of theory.

| Element Symbol | (Å) | (Å) | (Å) |
| --- | --- | --- | --- |
| H | -2.975886 | 4.029906 | 2.095244 |
| H | -4.606958 | 2.190880 | 2.296590 |
| H | -4.606958 | 2.190880 | -2.296590 |
| H | -2.975886 | 4.029906 | -2.095244 |
| H | -5.006142 | 0.185964 | 2.095244 |
| H | -5.006142 | 0.185964 | -2.095244 |
| H | -4.585290 | -2.235873 | 2.296590 |
| H | -4.585290 | -2.235873 | -2.296590 |
| H | -3.266671 | -3.798013 | -2.095244 |
| H | -3.266671 | -3.798013 | 2.095244 |
| H | -1.110805 | -4.978968 | -2.296590 |
| H | -1.110805 | -4.978968 | 2.296590 |
| H | 0.932670 | -4.922008 | 2.095244 |
| H | 0.932670 | -4.922008 | -2.095244 |
| H | 3.200138 | -3.972798 | 2.296590 |
| H | 3.200138 | -3.972798 | -2.296590 |
| H | 4.429691 | -2.339631 | -2.095244 |
| H | 4.429691 | -2.339631 | 2.095244 |
| H | 5.101312 | 0.024970 | -2.296590 |
| H | 5.101312 | 0.024970 | 2.296590 |
| H | 4.591065 | 2.004536 | 2.095244 |
| H | 4.591065 | 2.004536 | -2.095244 |
| H | 3.161094 | 4.003935 | 2.296590 |
| H | 3.161094 | 4.003935 | -2.296590 |
| H | 1.295273 | 4.839247 | -2.095244 |
| H | 1.295273 | 4.839247 | 2.095244 |
| H | -1.159492 | 4.967856 | -2.296590 |
| H | -1.159492 | 4.967856 | 2.296590 |
| B | 1.559844 | 4.633100 | 0.000000 |
| B | -0.603247 | 4.891398 | 1.233358 |
| B | -0.603247 | 4.891398 | -1.233358 |
| B | -2.649756 | 4.108226 | 0.000000 |
| B | -4.200367 | 2.578100 | 1.233358 |
| B | -4.200367 | 2.578100 | -1.233358 |
| B | -4.864036 | 0.489774 | 0.000000 |
| B | -4.634526 | -1.676561 | 1.233358 |
| B | -4.634526 | -1.676561 | -1.233358 |
| B | -3.415598 | -3.497488 | 0.000000 |
| B | -1.578792 | -4.668737 | 1.233358 |
| B | -1.578792 | -4.668737 | -1.233358 |
| B | 0.604856 | -4.851070 | 0.000000 |
| B | 2.665805 | -4.145259 | 1.233358 |
| B | 2.665805 | -4.145259 | -1.233358 |
| B | 4.169840 | -2.551697 | 0.000000 |
| B | 4.902996 | -0.500316 | 1.233358 |
| B | 4.902996 | -0.500316 | -1.233358 |
| B | 4.594850 | 1.669155 | 0.000000 |
| B | 3.448131 | 3.521374 | 1.233358 |
| B | 3.448131 | 3.521374 | -1.233358 |
| N | 4.318402 | 2.403839 | 1.208515 |
| N | 4.318402 | 2.403839 | -1.208515 |
| N | 2.884675 | 4.029281 | 0.000000 |
| N | 0.813083 | 4.875032 | 1.208515 |
| N | 0.813083 | 4.875032 | -1.208515 |
| N | -1.351653 | 4.767545 | 0.000000 |
| N | -3.304505 | 3.675226 | 1.208515 |
| N | -3.304505 | 3.675226 | -1.208515 |
| N | -4.570159 | 1.915751 | 0.000000 |
| N | -4.933733 | -0.292100 | 1.208515 |
| N | -4.933733 | -0.292100 | -1.208515 |
| N | -4.347242 | -2.378643 | 0.000000 |
| N | -2.847759 | -4.039469 | 1.208515 |
| N | -2.847759 | -4.039469 | -1.208515 |
| N | -0.850763 | -4.881870 | 0.000000 |
| N | 1.382635 | -4.745036 | 1.208515 |
| N | 1.382635 | -4.745036 | -1.208515 |
| N | 3.286358 | -3.708950 | 0.000000 |
| N | 4.571877 | -1.877494 | 1.208515 |
| N | 4.571877 | -1.877494 | -1.208515 |
| N | 4.948784 | 0.256886 | 0.000000 |

**Supplementary Table 20 |** Nuclear coordinates of S0 geometry of **4g: [8]CPP-BN** at the PBE0/6-31G(d) level of theory.

| Element Symbol | (Å) | (Å) | (Å) |
| --- | --- | --- | --- |
| H | 3.984412 | 4.075623 | 2.095128 |
| H | 5.397961 | 2.067752 | 2.297733 |
| H | 5.397961 | 2.067752 | -2.297733 |
| H | 3.984412 | 4.075623 | -2.095128 |
| H | 5.699305 | 0.064496 | 2.095128 |
| H | 5.699305 | 0.064496 | -2.095128 |
| H | 5.279056 | -2.354813 | 2.297733 |
| H | 5.279056 | -2.354813 | -2.297733 |
| H | 2.354813 | 5.279056 | -2.297733 |
| H | 2.354813 | 5.279056 | 2.297733 |
| H | -0.064496 | 5.699305 | -2.095128 |
| H | -0.064496 | 5.699305 | 2.095128 |
| H | 4.075623 | -3.984412 | -2.095128 |
| H | 4.075623 | -3.984412 | 2.095128 |
| H | 2.067752 | -5.397961 | -2.297733 |
| H | 2.067752 | -5.397961 | 2.297733 |
| H | 0.064496 | -5.699305 | 2.095128 |
| H | 0.064496 | -5.699305 | -2.095128 |
| H | -2.354813 | -5.279056 | 2.297733 |
| H | -2.354813 | -5.279056 | -2.297733 |
| H | -3.984412 | -4.075623 | -2.095128 |
| H | -3.984412 | -4.075623 | 2.095128 |
| H | -5.397961 | -2.067752 | -2.297733 |
| H | -5.397961 | -2.067752 | 2.297733 |
| H | -5.699305 | -0.064496 | 2.095128 |
| H | -5.699305 | -0.064496 | -2.095128 |
| H | -5.279056 | 2.354813 | 2.297733 |
| H | -5.279056 | 2.354813 | -2.297733 |
| H | -4.075623 | 3.984412 | -2.095128 |
| H | -4.075623 | 3.984412 | 2.095128 |
| H | -2.067752 | 5.397961 | -2.297733 |
| H | -2.067752 | 5.397961 | 2.297733 |
| B | -0.368775 | 5.581731 | 0.000000 |
| B | 1.799343 | 5.333891 | -1.232985 |
| B | 1.799343 | 5.333891 | 1.232985 |
| B | 3.686117 | 4.207643 | 0.000000 |
| B | 5.043958 | 2.499303 | -1.232985 |
| B | 5.043958 | 2.499303 | 1.232985 |
| B | 5.581731 | 0.368775 | 0.000000 |
| B | 5.333891 | -1.799343 | -1.232985 |
| B | 5.333891 | -1.799343 | 1.232985 |
| B | 4.207643 | -3.686117 | 0.000000 |
| B | 2.499303 | -5.043958 | -1.232985 |
| B | 2.499303 | -5.043958 | 1.232985 |
| B | 0.368775 | -5.581731 | 0.000000 |
| B | -1.799343 | -5.333891 | -1.232985 |
| B | -1.799343 | -5.333891 | 1.232985 |
| B | -3.686117 | -4.207643 | 0.000000 |
| B | -5.043958 | -2.499303 | -1.232985 |
| B | -5.043958 | -2.499303 | 1.232985 |
| B | -5.581731 | -0.368775 | 0.000000 |
| B | -5.333891 | 1.799343 | -1.232985 |
| B | -5.333891 | 1.799343 | 1.232985 |
| B | -4.207643 | 3.686117 | 0.000000 |
| B | -2.499303 | 5.043958 | -1.232985 |
| B | -2.499303 | 5.043958 | 1.232985 |
| N | -3.686559 | 4.270902 | -1.208298 |
| N | -3.686559 | 4.270902 | 1.208298 |
| N | -1.808015 | 5.353124 | 0.000000 |
| N | 0.413193 | 5.626775 | -1.208298 |
| N | 0.413193 | 5.626775 | 1.208298 |
| N | 2.506771 | 5.063690 | 0.000000 |
| N | 4.270902 | 3.686559 | -1.208298 |
| N | 4.270902 | 3.686559 | 1.208298 |
| N | 5.353124 | 1.808015 | 0.000000 |
| N | 5.626775 | -0.413193 | -1.208298 |
| N | 5.626775 | -0.413193 | 1.208298 |
| N | 5.063690 | -2.506771 | 0.000000 |
| N | 3.686559 | -4.270902 | -1.208298 |
| N | 3.686559 | -4.270902 | 1.208298 |
| N | 1.808015 | -5.353124 | 0.000000 |
| N | -0.413193 | -5.626775 | -1.208298 |
| N | -0.413193 | -5.626775 | 1.208298 |
| N | -2.506771 | -5.063690 | 0.000000 |
| N | -4.270902 | -3.686559 | -1.208298 |
| N | -4.270902 | -3.686559 | 1.208298 |
| N | -5.353124 | -1.808015 | 0.000000 |
| N | -5.626775 | 0.413193 | -1.208298 |
| N | -5.626775 | 0.413193 | 1.208298 |
| N | -5.063690 | 2.506771 | 0.000000 |

**Supplementary Table 21 |** Nuclear coordinates of S0 geometry of **4h: [9]CPP-BN** at the PBE0/6-31G(d) level of theory.

| Element Symbol | (Å) | (Å) | (Å) |
| --- | --- | --- | --- |
| H | 6.108665 | -2.118352 | 2.298672 |
| H | 4.815232 | -4.203614 | 2.094922 |
| H | 4.815232 | -4.203614 | -2.094922 |
| H | 6.108665 | -2.118352 | -2.298672 |
| H | 3.317858 | -5.549326 | 2.298672 |
| H | 0.986650 | -6.315327 | 2.094922 |
| H | 0.986650 | -6.315327 | -2.094922 |
| H | 3.317858 | -5.549326 | -2.298672 |
| H | -1.025411 | -6.383709 | 2.298672 |
| H | -3.303596 | -5.472027 | 2.094922 |
| H | -3.303596 | -5.472027 | -2.094922 |
| H | -1.025411 | -6.383709 | -2.298672 |
| H | -4.888879 | -4.231083 | 2.298672 |
| H | -6.048053 | -2.068306 | 2.094922 |
| H | -6.048053 | -2.068306 | -2.094922 |
| H | -4.888879 | -4.231083 | -2.298672 |
| H | -6.464786 | -0.098687 | 2.298672 |
| H | -5.962558 | 2.303199 | 2.094922 |
| H | -5.962558 | 2.303199 | -2.094922 |
| H | -6.464786 | -0.098687 | -2.298672 |
| H | -5.015748 | 4.079886 | 2.298672 |
| H | -3.087117 | 5.597012 | 2.094922 |
| H | -3.087117 | 5.597012 | -2.094922 |
| H | -5.015748 | 4.079886 | -2.298672 |
| H | -1.219786 | 6.349435 | 2.298672 |
| H | 1.232821 | 6.271920 | 2.094922 |
| H | 1.232821 | 6.271920 | -2.094922 |
| H | -1.219786 | 6.349435 | -2.298672 |
| H | 3.146928 | 5.648013 | 2.298672 |
| H | 4.975908 | 4.012127 | 2.094922 |
| H | 4.975908 | 4.012127 | -2.094922 |
| H | 3.146928 | 5.648013 | -2.298672 |
| H | 6.041159 | 2.303822 | 2.298672 |
| H | 6.390713 | -0.124984 | 2.094922 |
| H | 6.390713 | -0.124984 | -2.094922 |
| H | 6.041159 | 2.303822 | -2.298672 |
| B | -6.051076 | -1.748791 | 0.000000 |
| B | -5.118307 | -3.724308 | 1.232725 |
| B | -5.118307 | -3.724308 | -1.232725 |
| B | -3.511292 | -5.229208 | 0.000000 |
| B | -1.526912 | -6.142970 | 1.232725 |
| B | -1.526912 | -6.142970 | -1.232725 |
| B | 0.671465 | -6.262821 | 0.000000 |
| B | 2.778942 | -5.687268 | 1.232725 |
| B | 2.778942 | -5.687268 | -1.232725 |
| B | 4.540036 | -4.365990 | 0.000000 |
| B | 5.784499 | -2.570430 | 1.232725 |
| B | 5.784499 | -2.570430 | -1.232725 |
| B | 6.284273 | -0.426263 | 0.000000 |
| B | 6.083424 | 1.749140 | 1.232725 |
| B | 6.083424 | 1.749140 | -1.232725 |
| B | 5.088029 | 3.712916 | 0.000000 |
| B | 3.535847 | 5.250269 | 1.232725 |
| B | 3.535847 | 5.250269 | -1.232725 |
| B | 1.511040 | 6.114781 | 0.000000 |
| B | -0.666191 | 6.294738 | 1.232725 |
| B | -0.666191 | 6.294738 | -1.232725 |
| B | -2.772982 | 5.655472 | 0.000000 |
| B | -4.556512 | 4.393829 | 1.232725 |
| B | -4.556512 | 4.393829 | -1.232725 |
| B | -5.759494 | 2.549905 | 0.000000 |
| B | -6.314790 | 0.436999 | 1.232725 |
| B | -6.314790 | 0.436999 | -1.232725 |
| N | -6.070625 | 1.832264 | 1.208189 |
| N | -6.070625 | 1.832264 | -1.208189 |
| N | -6.339753 | -0.319199 | 0.000000 |
| N | -5.828125 | -2.498526 | 1.208189 |
| N | -5.828125 | -2.498526 | -1.208189 |
| N | -4.651356 | -4.319636 | 0.000000 |
| N | -2.858581 | -5.660229 | 1.208189 |
| N | -2.858581 | -5.660229 | -1.208189 |
| N | -0.786537 | -6.298867 | 0.000000 |
| N | 1.448525 | -6.173447 | 1.208189 |
| N | 1.448525 | -6.173447 | -1.208189 |
| N | 3.446311 | -5.330788 | 0.000000 |
| N | 5.077850 | -3.798041 | 1.208189 |
| N | 5.077850 | -3.798041 | -1.208189 |
| N | 6.066592 | -1.868374 | 0.000000 |
| N | 6.331192 | 0.354511 | 1.208189 |
| N | 6.331192 | 0.354511 | -1.208189 |
| N | 5.848247 | 2.468272 | 0.000000 |
| N | 4.622100 | 4.341183 | 1.208189 |
| N | 4.622100 | 4.341183 | -1.208189 |
| N | 2.893442 | 5.649987 | 0.000000 |
| N | 0.750275 | 6.296568 | 1.208189 |
| N | 0.750275 | 6.296568 | -1.208189 |
| N | -1.415236 | 6.188010 | 0.000000 |
| N | -3.472611 | 5.305718 | 1.208189 |
| N | -3.472611 | 5.305718 | -1.208189 |
| N | -5.061710 | 3.830594 | 0.000000 |

**Supplementary Table 22 |** Nuclear coordinates of S0 geometry of **4i: [10]CPP-BN** at the PBE0/6-31G(d) level of theory.

| Element Symbol | (Å) | (Å) | (Å) |
| --- | --- | --- | --- |
| H | 6.575181 | -2.643570 | 2.094669 |
| H | 7.147899 | -0.258765 | 2.299073 |
| H | 7.147899 | -0.258765 | -2.299073 |
| H | 6.575181 | -2.643570 | -2.094669 |
| H | 6.873285 | 1.726102 | 2.094669 |
| H | 6.873285 | 1.726102 | -2.094669 |
| H | 5.934870 | 3.992084 | 2.299073 |
| H | 5.934870 | 3.992084 | -2.299073 |
| H | 5.630673 | -4.410775 | -2.299073 |
| H | 5.630673 | -4.410775 | 2.299073 |
| H | 3.765582 | -6.003488 | -2.094669 |
| H | 3.765582 | -6.003488 | 2.094669 |
| H | 4.546027 | 5.436461 | -2.094669 |
| H | 4.546027 | 5.436461 | 2.094669 |
| H | 2.454922 | 6.718093 | -2.299073 |
| H | 2.454922 | 6.718093 | 2.299073 |
| H | 0.482342 | 7.070277 | 2.094669 |
| H | 0.482342 | 7.070277 | -2.094669 |
| H | -1.962722 | 6.878018 | 2.299073 |
| H | -1.962722 | 6.878018 | -2.299073 |
| H | -3.765582 | 6.003488 | -2.094669 |
| H | -3.765582 | 6.003488 | 2.094669 |
| H | -5.630673 | 4.410775 | -2.299073 |
| H | -5.630673 | 4.410775 | 2.299073 |
| H | -6.575181 | 2.643570 | 2.094669 |
| H | -6.575181 | 2.643570 | -2.094669 |
| H | -7.147899 | 0.258765 | 2.299073 |
| H | -7.147899 | 0.258765 | -2.299073 |
| H | -6.873285 | -1.726102 | -2.094669 |
| H | -6.873285 | -1.726102 | 2.094669 |
| H | -5.934870 | -3.992084 | -2.299073 |
| H | -5.934870 | -3.992084 | 2.299073 |
| H | -4.546027 | -5.436461 | 2.094669 |
| H | -4.546027 | -5.436461 | -2.094669 |
| H | -2.454922 | -6.718093 | 2.299073 |
| H | -2.454922 | -6.718093 | -2.299073 |
| H | -0.482342 | -7.070277 | -2.094669 |
| H | -0.482342 | -7.070277 | 2.094669 |
| H | 1.962722 | -6.878018 | -2.299073 |
| H | 1.962722 | -6.878018 | 2.299073 |
| B | 0.777624 | 6.960260 | 0.000000 |
| B | -1.407968 | 6.887819 | 1.232555 |
| B | -1.407968 | 6.887819 | -1.232555 |
| B | -3.462027 | 6.088045 | 0.000000 |
| B | -5.187629 | 4.744780 | 1.232555 |
| B | -5.187629 | 4.744780 | -1.232555 |
| B | -6.379302 | 2.890403 | 0.000000 |
| B | -6.985791 | 0.789396 | 1.232555 |
| B | -6.985791 | 0.789396 | -1.232555 |
| B | -6.859900 | -1.411274 | 0.000000 |
| B | -6.115619 | -3.467511 | 1.232555 |
| B | -6.115619 | -3.467511 | -1.232555 |
| B | -4.720250 | -5.173893 | 0.000000 |
| B | -2.909488 | -6.399946 | 1.232555 |
| B | -2.909488 | -6.399946 | -1.232555 |
| B | -0.777624 | -6.960260 | 0.000000 |
| B | 1.407968 | -6.887819 | 1.232555 |
| B | 1.407968 | -6.887819 | -1.232555 |
| B | 3.462027 | -6.088045 | 0.000000 |
| B | 5.187629 | -4.744780 | 1.232555 |
| B | 5.187629 | -4.744780 | -1.232555 |
| B | 6.379302 | -2.890403 | 0.000000 |
| B | 6.985791 | -0.789396 | 1.232555 |
| B | 6.985791 | -0.789396 | -1.232555 |
| B | 6.859900 | 1.411274 | 0.000000 |
| B | 6.115619 | 3.467511 | 1.232555 |
| B | 6.115619 | 3.467511 | -1.232555 |
| B | 4.720250 | 5.173893 | 0.000000 |
| B | 2.909488 | 6.399946 | 1.232555 |
| B | 2.909488 | 6.399946 | -1.232555 |
| N | 4.139167 | 5.697074 | 1.207930 |
| N | 4.139167 | 5.697074 | -1.207930 |
| N | 2.210929 | 6.690474 | 0.000000 |
| N | 0.000000 | 7.041971 | 1.207930 |
| N | 0.000000 | 7.041971 | -1.207930 |
| N | -2.143883 | 6.712259 | 0.000000 |
| N | -4.139167 | 5.697074 | 1.207930 |
| N | -4.139167 | 5.697074 | -1.207930 |
| N | -5.679804 | 4.170189 | 0.000000 |
| N | -6.697313 | 2.176089 | 1.207930 |
| N | -6.697313 | 2.176089 | -1.207930 |
| N | -7.046234 | 0.035249 | 0.000000 |
| N | -6.697313 | -2.176089 | 1.207930 |
| N | -6.697313 | -2.176089 | -1.207930 |
| N | -5.721241 | -4.113156 | 0.000000 |
| N | -4.139167 | -5.697074 | 1.207930 |
| N | -4.139167 | -5.697074 | -1.207930 |
| N | -2.210929 | -6.690474 | 0.000000 |
| N | 0.000000 | -7.041971 | 1.207930 |
| N | 0.000000 | -7.041971 | -1.207930 |
| N | 2.143883 | -6.712259 | 0.000000 |
| N | 4.139167 | -5.697074 | 1.207930 |
| N | 4.139167 | -5.697074 | -1.207930 |
| N | 5.679804 | -4.170189 | 0.000000 |
| N | 6.697313 | -2.176089 | 1.207930 |
| N | 6.697313 | -2.176089 | -1.207930 |
| N | 7.046234 | -0.035249 | 0.000000 |
| N | 6.697313 | 2.176089 | 1.207930 |
| N | 6.697313 | 2.176089 | -1.207930 |
| N | 5.721241 | 4.113156 | 0.000000 |

**Supplementary Table 23 |** Nuclear coordinates of S0 geometry of **4j: [11]CPP-BN** at the PBE0/6-31G(d) level of theory.

| Element Symbol | (Å) | (Å) | (Å) |
| --- | --- | --- | --- |
| H | 4.192075 | -6.559129 | 2.094461 |
| H | 1.970040 | -7.595255 | 2.299681 |
| H | 1.970040 | -7.595255 | -2.299681 |
| H | 4.192075 | -6.559129 | -2.094461 |
| H | -0.018441 | -7.785790 | 2.094493 |
| H | -2.447619 | -7.455103 | 2.299713 |
| H | -2.447619 | -7.455103 | -2.299713 |
| H | -0.018441 | -7.785790 | -2.094493 |
| H | -4.223015 | -6.539279 | 2.094462 |
| H | -6.087023 | -4.946709 | 2.299660 |
| H | -6.087023 | -4.946709 | -2.299660 |
| H | -4.223015 | -6.539279 | -2.094462 |
| H | -7.085508 | -3.216574 | 2.094475 |
| H | -7.793925 | -0.869484 | 2.299663 |
| H | -7.793925 | -0.869484 | -2.299663 |
| H | -7.085508 | -3.216574 | -2.094475 |
| H | -7.698630 | 1.125868 | 2.094489 |
| H | -7.026152 | 3.483481 | 2.299712 |
| H | -7.026152 | 3.483481 | -2.299712 |
| H | -7.698630 | 1.125868 | -2.094489 |
| H | -5.869253 | 5.111871 | 2.094463 |
| H | -4.029409 | 6.732443 | 2.299652 |
| H | -4.029409 | 6.732443 | -2.299652 |
| H | -5.869253 | 5.111871 | -2.094463 |
| H | -2.174949 | 7.475026 | 2.094506 |
| H | 0.248942 | 7.842698 | 2.299714 |
| H | 0.248942 | 7.842698 | -2.299714 |
| H | -2.174949 | 7.475026 | -2.094506 |
| H | 2.210558 | 7.465335 | 2.094460 |
| H | 4.448036 | 6.462937 | 2.299650 |
| H | 4.448036 | 6.462937 | -2.299650 |
| H | 2.210558 | 7.465335 | -2.094460 |
| H | 5.893168 | 5.083795 | 2.094507 |
| H | 7.233096 | 3.030704 | 2.299669 |
| H | 7.233096 | 3.030704 | -2.299669 |
| H | 5.893168 | 5.083795 | -2.094507 |
| H | 7.704130 | 1.089454 | 2.094477 |
| H | 7.722683 | -1.362199 | 2.299661 |
| H | 7.722683 | -1.362199 | -2.299661 |
| H | 7.704130 | 1.089454 | -2.094477 |
| H | 7.069953 | -3.250075 | 2.094507 |
| H | 5.761367 | -5.323398 | 2.299690 |
| H | 5.761367 | -5.323398 | -2.299690 |
| H | 7.069953 | -3.250075 | -2.094507 |
| B | 5.634497 | 5.257816 | 0.000000 |
| B | 6.904600 | 3.476050 | -1.232463 |
| B | 6.904600 | 3.476050 | 1.232463 |
| B | 7.580254 | 1.375643 | 0.000000 |
| B | 7.686648 | -0.809937 | -1.232453 |
| B | 7.686648 | -0.809937 | 1.232453 |
| B | 7.120491 | -2.942520 | 0.000000 |
| B | 6.029647 | -4.839306 | -1.232484 |
| B | 6.029647 | -4.839306 | 1.232484 |
| B | 4.400965 | -6.327760 | 0.000000 |
| B | 2.457462 | -7.333192 | -1.232466 |
| B | 2.457462 | -7.333192 | 1.232466 |
| B | 0.282459 | -7.703876 | 0.000000 |
| B | -1.895981 | -7.498339 | -1.232471 |
| B | -1.895981 | -7.498339 | 1.232471 |
| B | -3.925774 | -6.633499 | 0.000000 |
| B | -5.646359 | -5.281521 | -1.232424 |
| B | -5.646359 | -5.281521 | 1.232424 |
| B | -6.886286 | -3.456384 | 0.000000 |
| B | -7.603841 | -1.389224 | -1.232447 |
| B | -7.603841 | -1.389224 | 1.232447 |
| B | -7.660802 | 0.816476 | 0.000000 |
| B | -7.147307 | 2.943529 | -1.232483 |
| B | -7.147307 | 2.943529 | 1.232483 |
| B | -6.004108 | 4.830581 | 0.000000 |
| B | -4.423018 | 6.343273 | -1.232451 |
| B | -4.423018 | 6.343273 | 1.232451 |
| B | -2.440684 | 7.311962 | 0.000000 |
| B | -0.292528 | 7.728596 | -1.232467 |
| B | -0.292528 | 7.728596 | 1.232467 |
| B | 1.898768 | 7.471603 | 0.000000 |
| B | 3.930811 | 6.659889 | -1.232445 |
| B | 3.930811 | 6.659889 | 1.232445 |
| N | 2.654618 | 7.274506 | -1.207862 |
| N | 4.569390 | 6.255155 | 0.000000 |
| N | 2.654618 | 7.274506 | 1.207862 |
| N | 6.163577 | 4.683248 | -1.207899 |
| N | 7.222851 | 2.790329 | 0.000000 |
| N | 6.163577 | 4.683248 | 1.207899 |
| N | 7.715138 | 0.606255 | -1.207875 |
| N | 7.584028 | -1.558973 | 0.000000 |
| N | 7.715138 | 0.606255 | 1.207875 |
| N | 6.818459 | -3.662794 | -1.207917 |
| N | 5.538853 | -5.414335 | 0.000000 |
| N | 6.818459 | -3.662794 | 1.207917 |
| N | 3.757311 | -6.770336 | -1.207868 |
| N | 1.733592 | -7.551274 | 0.000000 |
| N | 3.757311 | -6.770336 | 1.207868 |
| N | -0.498252 | -7.728121 | -1.207878 |
| N | -0.498252 | -7.728121 | 1.207878 |
| N | -2.622736 | -7.290169 | 0.000000 |
| N | -4.595355 | -6.231136 | -1.207852 |
| N | -4.595355 | -6.231136 | 1.207852 |
| N | -6.144989 | -4.713200 | 0.000000 |
| N | -7.232231 | -2.756101 | -1.207870 |
| N | -7.232231 | -2.756101 | 1.207870 |
| N | -7.716360 | -0.641613 | 0.000000 |
| N | -7.573319 | 1.592643 | -1.207892 |
| N | -7.573319 | 1.592643 | 1.207892 |
| N | -6.838333 | 3.633452 | 0.000000 |
| N | -5.511494 | 5.436840 | -1.207859 |
| N | -5.511494 | 5.436840 | 1.207859 |
| N | -3.790007 | 6.756616 | 0.000000 |
| N | -1.698339 | 7.554987 | -1.207878 |
| N | -1.698339 | 7.554987 | 1.207878 |
| N | 0.463418 | 7.734081 | 0.000000 |

**Supplementary Table 24 |** Nuclear coordinates of S0 geometry of **4k: [12]CPP-BN** at the PBE0/6-31G(d) level of theory.

| Element Symbol | (Å) | (Å) | (Å) |
| --- | --- | --- | --- |
| H | 8.288152 | 1.995978 | 2.301855 |
| H | 8.458600 | -0.448544 | 2.095496 |
| H | 8.480039 | -0.446038 | -2.093339 |
| H | 8.312196 | 1.999191 | -2.298164 |
| H | 8.198169 | -2.424748 | 2.298164 |
| H | 7.120910 | -4.626300 | 2.093339 |
| H | 7.101090 | -4.617751 | -2.095496 |
| H | 8.175739 | -2.415509 | -2.301855 |
| H | 5.872643 | -6.179761 | 2.301855 |
| H | 3.840849 | -7.549634 | 2.095496 |
| H | 3.853739 | -7.566948 | -2.093339 |
| H | 5.887449 | -6.198978 | -2.298164 |
| H | 1.999191 | -8.312196 | 2.298164 |
| H | -0.446038 | -8.480039 | 2.093339 |
| H | -0.448544 | -8.458600 | -2.095496 |
| H | 1.995978 | -8.288152 | -2.301855 |
| H | -2.415509 | -8.175739 | 2.301855 |
| H | -4.617751 | -7.101090 | 2.095496 |
| H | -4.626300 | -7.120910 | -2.093339 |
| H | -2.424748 | -8.198169 | -2.298164 |
| H | -6.198978 | -5.887449 | 2.298164 |
| H | -7.566948 | -3.853739 | 2.093339 |
| H | -7.549634 | -3.840849 | -2.095496 |
| H | -6.179761 | -5.872643 | -2.301855 |
| H | -8.288152 | -1.995978 | 2.301855 |
| H | -8.458600 | 0.448544 | 2.095496 |
| H | -8.480039 | 0.446038 | -2.093339 |
| H | -8.312196 | -1.999191 | -2.298164 |
| H | -8.198169 | 2.424748 | 2.298164 |
| H | -7.120910 | 4.626300 | 2.093339 |
| H | -7.101090 | 4.617751 | -2.095496 |
| H | -8.175739 | 2.415509 | -2.301855 |
| H | -5.872643 | 6.179761 | 2.301855 |
| H | -3.840849 | 7.549634 | 2.095496 |
| H | -3.853739 | 7.566948 | -2.093339 |
| H | -5.887449 | 6.198978 | -2.298164 |
| H | -1.999191 | 8.312196 | 2.298164 |
| H | 0.446038 | 8.480039 | 2.093339 |
| H | 0.448544 | 8.458600 | -2.095496 |
| H | -1.995978 | 8.288152 | -2.301855 |
| H | 2.415509 | 8.175739 | 2.301855 |
| H | 4.617751 | 7.101090 | 2.095496 |
| H | 4.626300 | 7.120910 | -2.093339 |
| H | 2.424748 | 8.198169 | -2.298164 |
| H | 6.198978 | 5.887449 | 2.298164 |
| H | 7.566948 | 3.853739 | 2.093339 |
| H | 7.549634 | 3.840849 | -2.095496 |
| H | 6.179761 | 5.872643 | -2.301855 |
| B | -8.377445 | 0.742988 | 0.000450 |
| B | -8.302623 | -1.444500 | 1.233777 |
| B | -8.314764 | -1.445914 | -1.230873 |
| B | -7.626574 | -3.545276 | -0.000450 |
| B | -6.477840 | -5.409581 | 1.230873 |
| B | -6.468032 | -5.402285 | -1.233777 |
| B | -4.832169 | -6.883587 | 0.000450 |
| B | -2.900338 | -7.912532 | 1.233777 |
| B | -2.905183 | -7.923754 | -1.230873 |
| B | -0.742988 | -8.377445 | -0.000450 |
| B | 1.445914 | -8.314764 | 1.230873 |
| B | 1.444500 | -8.302623 | -1.233777 |
| B | 3.545276 | -7.626574 | 0.000450 |
| B | 5.402285 | -6.468032 | 1.233777 |
| B | 5.409581 | -6.477840 | -1.230873 |
| B | 6.883587 | -4.832169 | -0.000450 |
| B | 7.923754 | -2.905183 | 1.230873 |
| B | 7.912532 | -2.900338 | -1.233777 |
| B | 8.377445 | -0.742988 | 0.000450 |
| B | 8.302623 | 1.444500 | 1.233777 |
| B | 8.314764 | 1.445914 | -1.230873 |
| B | 7.626574 | 3.545276 | -0.000450 |
| B | 6.477840 | 5.409581 | 1.230873 |
| B | 6.468032 | 5.402285 | -1.233777 |
| B | 4.832169 | 6.883587 | 0.000450 |
| B | 2.900338 | 7.912532 | 1.233777 |
| B | 2.905183 | 7.923754 | -1.230873 |
| B | 0.742988 | 8.377445 | -0.000450 |
| B | -1.445914 | 8.314764 | 1.230873 |
| B | -1.444500 | 8.302623 | -1.233777 |
| B | -3.545276 | 7.626574 | 0.000450 |
| B | -5.402285 | 6.468032 | 1.233777 |
| B | -5.409581 | 6.477840 | -1.230873 |
| B | -6.883587 | 4.832169 | -0.000450 |
| B | -7.923754 | 2.905183 | 1.230873 |
| B | -7.912532 | 2.900338 | -1.233777 |
| N | 8.436745 | 0.034378 | 1.208974 |
| N | 8.157138 | 2.185699 | 0.001135 |
| N | 8.448559 | 0.035802 | -1.206528 |
| N | 8.157138 | -2.185699 | -0.001135 |
| N | 7.334568 | -4.193274 | 1.206528 |
| N | 7.323624 | -4.188600 | -1.208974 |
| N | 5.971440 | -5.971440 | 0.001135 |
| N | 4.248145 | -7.289246 | 1.208974 |
| N | 4.255285 | -7.298765 | -1.206528 |
| N | 7.298765 | 4.255285 | 1.206528 |
| N | 7.289246 | 4.248145 | -1.208974 |
| N | 5.971440 | 5.971440 | -0.001135 |
| N | 4.188600 | 7.323624 | 1.208974 |
| N | 4.193274 | 7.334568 | -1.206528 |
| N | 2.185699 | 8.157138 | 0.001135 |
| N | -0.035802 | 8.448559 | 1.206528 |
| N | -0.034378 | 8.436745 | -1.208974 |
| N | -2.185699 | 8.157138 | -0.001135 |
| N | -4.248145 | 7.289246 | 1.208974 |
| N | -4.255285 | 7.298765 | -1.206528 |
| N | -5.971440 | 5.971440 | 0.001135 |
| N | -7.334568 | 4.193274 | 1.206528 |
| N | -7.323624 | 4.188600 | -1.208974 |
| N | -8.157138 | 2.185699 | -0.001135 |
| N | -8.436745 | -0.034378 | 1.208974 |
| N | -8.448559 | -0.035802 | -1.206528 |
| N | -8.157138 | -2.185699 | 0.001135 |
| N | -7.298765 | -4.255285 | 1.206528 |
| N | -5.971440 | -5.971440 | -0.001135 |
| N | -7.289246 | -4.248145 | -1.208974 |
| N | -4.188600 | -7.323624 | 1.208974 |
| N | -4.193274 | -7.334568 | -1.206528 |
| N | -2.185699 | -8.157138 | 0.001135 |
| N | 0.035802 | -8.448559 | 1.206528 |
| N | 0.034378 | -8.436745 | -1.208974 |
| N | 2.185699 | -8.157138 | -0.001135 |

**Supplementary Table 25 |** Nuclear coordinates of S0 geometry of **5: [6]CMP-BN** at the PBE0/6-31G(d) level of theory.

| Element Symbol | (Å) | (Å) | (Å) |
| --- | --- | --- | --- |
| H | -2.089838 | -5.569200 | -0.432099 |
| H | 2.089838 | -5.569200 | -0.432099 |
| H | 5.867987 | 0.974747 | -0.432099 |
| H | 3.778150 | 4.594452 | -0.432099 |
| H | -3.778150 | 4.594452 | -0.432099 |
| H | -5.867987 | 0.974747 | -0.432099 |
| H | 0.000000 | 6.731134 | 0.640929 |
| H | -5.829333 | -3.365567 | 0.640929 |
| H | 5.829333 | -3.365567 | 0.640929 |
| B | -3.798250 | 0.734211 | -0.064990 |
| B | -2.534971 | 2.922275 | -0.064990 |
| B | -5.009796 | 2.892407 | -0.460167 |
| H | -6.030815 | 3.481892 | -0.686623 |
| B | 0.000000 | 2.981767 | -0.057425 |
| H | 0.000000 | 1.806039 | -0.300451 |
| B | -1.251519 | 5.073265 | 0.327273 |
| H | -2.264117 | 5.705184 | 0.453199 |
| B | 1.251519 | 5.073265 | 0.327273 |
| H | 2.264117 | 5.705184 | 0.453199 |
| B | 2.534971 | 2.922275 | -0.064990 |
| B | 3.798250 | 0.734211 | -0.064990 |
| B | 5.009796 | 2.892407 | -0.460167 |
| H | 6.030815 | 3.481892 | -0.686623 |
| B | 5.019336 | -1.452785 | 0.327273 |
| H | 6.072893 | -0.891809 | 0.453199 |
| B | 3.767817 | -3.620480 | 0.327273 |
| H | 3.808776 | -4.813375 | 0.453199 |
| B | 2.582286 | -1.490883 | -0.057425 |
| H | 1.564075 | -0.903019 | -0.300451 |
| B | 1.263279 | -3.656486 | -0.064990 |
| B | 0.000000 | -5.784814 | -0.460167 |
| H | 0.000000 | -6.963785 | -0.686623 |
| B | -1.263279 | -3.656486 | -0.064990 |
| B | -2.582286 | -1.490883 | -0.057425 |
| H | -1.564075 | -0.903019 | -0.300451 |
| B | -3.767817 | -3.620480 | 0.327273 |
| H | -3.808776 | -4.813375 | 0.453199 |
| B | -5.019336 | -1.452785 | 0.327273 |
| H | -6.072893 | -0.891809 | 0.453199 |
| N | -4.997126 | 1.473455 | -0.326739 |
| N | -3.774613 | 3.590910 | -0.326739 |
| N | -1.262186 | 3.659025 | 0.069378 |
| N | 0.000000 | 5.739907 | 0.448639 |
| N | 1.262186 | 3.659025 | 0.069378 |
| N | 3.774613 | 3.590910 | -0.326739 |
| N | 4.997126 | 1.473455 | -0.326739 |
| N | 3.799902 | -0.736427 | 0.069378 |
| N | 4.970905 | -2.869954 | 0.448639 |
| N | 2.537715 | -2.922598 | 0.069378 |
| N | 1.222513 | -5.064366 | -0.326739 |
| N | -1.222513 | -5.064366 | -0.326739 |
| N | -2.537715 | -2.922598 | 0.069378 |
| N | -3.799902 | -0.736427 | 0.069378 |
| N | -4.970905 | -2.869954 | 0.448639 |
| N | 2.596902 | 1.499322 | 0.066923 |
| H | 1.739977 | 1.004576 | 0.263187 |
| N | 0.000000 | -2.998644 | 0.066923 |
| H | 0.000000 | -2.009152 | 0.263187 |
| N | -2.596902 | 1.499322 | 0.066923 |
| H | -1.739977 | 1.004576 | 0.263187 |

**Supplementary Table 26 |** Nuclear coordinates of S0 geometry of **6a: [2]PP-BN** at the PBE0/6-31G(d) level of theory.

| Element Symbol | (Å) | (Å) | (Å) |
| --- | --- | --- | --- |
| H | -0.005474 | 2.091886 | -3.399624 |
| H | -0.007067 | 2.300831 | -0.929648 |
| H | 0.007067 | -2.300831 | -0.929648 |
| H | 0.005474 | -2.091886 | -3.399624 |
| H | 0.000000 | 0.000000 | -4.861010 |
| H | -0.598852 | -2.008249 | 0.996729 |
| H | 0.598852 | 2.008249 | 0.996729 |
| H | -0.651047 | -2.197371 | 3.510188 |
| H | 0.651047 | 2.197371 | 3.510188 |
| H | 0.000000 | 0.000000 | 4.616350 |
| B | 0.000000 | 0.000000 | -3.662169 |
| B | 0.001366 | 1.235429 | -1.483622 |
| B | -0.001366 | -1.235429 | -1.483622 |
| B | 0.000000 | 0.000000 | 0.730858 |
| B | 0.353127 | 1.197659 | 2.915890 |
| B | -0.353127 | -1.197659 | 2.915890 |
| N | 0.000000 | -1.210269 | -2.907868 |
| N | 0.000000 | 1.210269 | -2.907868 |
| N | 0.000000 | 0.000000 | -0.742640 |
| N | 0.343947 | 1.166180 | 1.491402 |
| N | -0.343947 | -1.166180 | 1.491402 |
| N | 0.000000 | 0.000000 | 3.607463 |

**Supplementary Table 27 |** Nuclear coordinates of S0 geometry of **6b: [3]PP-BN** at the PBE0/6-31G(d) level of theory.

| Element Symbol | (Å) | (Å) | (Å) |
| --- | --- | --- | --- |
| H | 2.283640 | -0.192017 | 5.713755 |
| H | 2.087769 | -0.178641 | 3.200107 |
| H | -2.087769 | 0.178641 | 3.200107 |
| H | -2.283640 | 0.192017 | 5.713755 |
| H | 0.000000 | 0.000000 | 6.820172 |
| H | -2.272404 | -0.355533 | 1.259943 |
| H | 2.272404 | 0.355533 | 1.259943 |
| H | -2.069523 | -0.322553 | -1.189618 |
| H | 2.069523 | 0.322553 | -1.189618 |
| H | -2.296759 | 0.154902 | -3.138972 |
| H | 2.296759 | -0.154902 | -3.138972 |
| H | -2.087306 | 0.138922 | -5.607371 |
| H | 2.087306 | -0.138922 | -5.607371 |
| H | 0.000000 | 0.000000 | -7.068127 |
| B | 0.000000 | 0.000000 | -5.869669 |
| B | 1.233826 | -0.078699 | -3.691973 |
| B | -1.233826 | 0.078699 | -3.691973 |
| B | 0.000000 | 0.000000 | -1.480666 |
| B | 1.216747 | 0.183605 | 0.712379 |
| B | -1.216747 | -0.183605 | 0.712379 |
| B | 0.000000 | 0.000000 | 2.932592 |
| B | 1.244182 | -0.103162 | 5.118929 |
| B | -1.244182 | 0.103162 | 5.118929 |
| N | 1.207979 | -0.077777 | -5.115147 |
| N | -1.207979 | 0.077777 | -5.115147 |
| N | 0.000000 | 0.000000 | -2.949954 |
| N | 1.193777 | 0.179729 | -0.708301 |
| N | -1.193777 | -0.179729 | -0.708301 |
| N | 0.000000 | 0.000000 | 1.462008 |
| N | 1.211690 | -0.100474 | 3.695147 |
| N | -1.211690 | 0.100474 | 3.695147 |
| N | 0.000000 | 0.000000 | 5.811352 |

**Supplementary Table 28 |** Nuclear coordinates of S0 geometry of **6c: [4]PP-BN** at the PBE0/6-31G(d) level of theory.

| Element Symbol | (Å) | (Å) | (Å) |
| --- | --- | --- | --- |
| H | 2.293659 | -0.174147 | 3.463673 |
| H | -2.293659 | 0.174147 | 3.463673 |
| H | 2.088373 | -0.157029 | 1.014863 |
| H | -2.088373 | 0.157029 | 1.014863 |
| H | -2.072073 | -0.310323 | 5.404972 |
| H | 2.072073 | 0.310323 | 5.404972 |
| H | -2.266811 | -0.336549 | 7.918851 |
| H | 2.266811 | 0.336549 | 7.918851 |
| H | 0.000000 | 0.000000 | 9.025366 |
| H | -2.296360 | -0.150873 | -0.949087 |
| H | 2.296360 | 0.150873 | -0.949087 |
| H | -2.090129 | -0.136140 | -3.396314 |
| H | 2.090129 | 0.136140 | -3.396314 |
| H | -2.279775 | 0.321484 | -5.346145 |
| H | 2.279775 | -0.321484 | -5.346145 |
| H | -2.071640 | 0.290542 | -7.813932 |
| H | 2.071640 | -0.290542 | -7.813932 |
| H | 0.000000 | 0.000000 | -9.274552 |
| B | 0.000000 | 0.000000 | -8.076287 |
| B | 1.225059 | -0.168478 | -5.898845 |
| B | -1.225059 | 0.168478 | -5.898845 |
| B | 0.000000 | 0.000000 | -3.688131 |
| B | 1.229040 | 0.075842 | -1.495363 |
| B | -1.229040 | -0.075842 | -1.495363 |
| B | 0.000000 | 0.000000 | 0.721725 |
| B | 1.227237 | -0.087245 | 2.916200 |
| B | -1.227237 | 0.087245 | 2.916200 |
| B | 0.000000 | 0.000000 | 5.136893 |
| B | 1.235042 | 0.182011 | 7.323791 |
| B | -1.235042 | -0.182011 | 7.323791 |
| N | 1.199103 | -0.165742 | -7.321583 |
| N | -1.199103 | 0.165742 | -7.321583 |
| N | 0.000000 | 0.000000 | -5.156270 |
| N | 1.205076 | 0.073666 | -2.914766 |
| N | -1.205076 | -0.073666 | -2.914766 |
| N | 0.000000 | 0.000000 | -0.744374 |
| N | 1.204108 | -0.085498 | 1.496414 |
| N | -1.204108 | 0.085498 | 1.496414 |
| N | 0.000000 | 0.000000 | 3.667122 |
| N | 1.202795 | 0.177325 | 5.900308 |
| N | -1.202795 | -0.177325 | 5.900308 |
| N | 0.000000 | 0.000000 | 8.016575 |

**Supplementary Table 29 |** Nuclear coordinates of S0 geometry of **6d: [5]PP-BN** at the PBE0/6-31G(d) level of theory.

| Element Symbol | (Å) | (Å) | (Å) |
| --- | --- | --- | --- |
| H | 2.288497 | -0.233110 | 5.669050 |
| H | -2.288497 | 0.233110 | 5.669050 |
| H | 2.083467 | -0.210210 | 3.220465 |
| H | -2.083467 | 0.210210 | 3.220465 |
| H | -2.080844 | -0.243657 | 7.610754 |
| H | 2.080844 | 0.243657 | 7.610754 |
| H | -2.276408 | -0.263783 | 10.124803 |
| H | 2.276408 | 0.263783 | 10.124803 |
| H | 0.000000 | 0.000000 | 11.231334 |
| H | -2.301672 | 0.010648 | 1.254428 |
| H | 2.301672 | -0.010648 | 1.254428 |
| H | -2.094277 | 0.011416 | -1.191476 |
| H | 2.094277 | -0.011416 | -1.191476 |
| H | 2.292061 | 0.211279 | -3.156780 |
| H | -2.292061 | -0.211279 | -3.156780 |
| H | 2.085770 | 0.191452 | -5.602819 |
| H | -2.085770 | -0.191452 | -5.602819 |
| H | -2.290184 | 0.237883 | -7.553100 |
| H | 2.290184 | -0.237883 | -7.553100 |
| H | -2.080882 | 0.214487 | -10.020568 |
| H | 2.080882 | -0.214487 | -10.020568 |
| H | 0.000000 | 0.000000 | -11.481119 |
| B | 0.000000 | 0.000000 | -10.282950 |
| B | 1.230490 | -0.123677 | -8.105628 |
| B | -1.230490 | 0.123677 | -8.105628 |
| B | 0.000000 | 0.000000 | -5.895137 |
| B | 1.226692 | 0.109052 | -3.702371 |
| B | -1.226692 | -0.109052 | -3.702371 |
| B | 0.000000 | 0.000000 | -1.485633 |
| B | 1.231103 | -0.007146 | 0.708671 |
| B | -1.231103 | 0.007146 | 0.708671 |
| B | 0.000000 | 0.000000 | 2.926458 |
| B | 1.224451 | -0.119181 | 5.121583 |
| B | -1.224451 | 0.119181 | 5.121583 |
| B | 0.000000 | 0.000000 | 7.342468 |
| B | 1.240209 | 0.142391 | 9.529604 |
| B | -1.240209 | -0.142391 | 9.529604 |
| N | 1.204376 | -0.121801 | -9.528144 |
| N | -1.204376 | 0.121801 | -9.528144 |
| N | 0.000000 | 0.000000 | -7.362756 |
| N | 1.202608 | 0.106195 | -5.121237 |
| N | -1.202608 | -0.106195 | -5.121237 |
| N | 0.000000 | 0.000000 | -2.950536 |
| N | 1.207156 | -0.006442 | -0.709772 |
| N | -1.207156 | 0.006442 | -0.709772 |
| N | 0.000000 | 0.000000 | 1.461211 |
| N | 1.201347 | -0.116884 | 3.702197 |
| N | -1.201347 | 0.116884 | 3.702197 |
| N | 0.000000 | 0.000000 | 5.873101 |
| N | 1.207842 | 0.138719 | 8.106284 |
| N | -1.207842 | -0.138719 | 8.106284 |
| N | 0.000000 | 0.000000 | 10.222560 |

**Supplementary Table 30 |** Nuclear coordinates of S0 geometry of **6e: [6]PP-BN** at the PBE0/6-31G(d) level of theory.

| Element Symbol | (Å) | (Å) | (Å) |
| --- | --- | --- | --- |
| H | 2.286641 | -0.251220 | 7.874720 |
| H | -2.286641 | 0.251220 | 7.874720 |
| H | 2.081603 | -0.226782 | 5.425939 |
| H | -2.081603 | 0.226782 | 5.425939 |
| H | -2.083122 | -0.222826 | 9.816408 |
| H | 2.083122 | 0.222826 | 9.816408 |
| H | -2.278919 | -0.241057 | 12.330560 |
| H | 2.278919 | 0.241057 | 12.330560 |
| H | 0.000000 | 0.000000 | 13.437080 |
| H | -2.301537 | 0.026495 | 3.460254 |
| H | 2.301537 | -0.026495 | 3.460254 |
| H | -2.093932 | 0.025416 | 1.014136 |
| H | 2.093932 | -0.025416 | 1.014136 |
| H | 2.301912 | 0.030551 | -0.952763 |
| H | -2.301912 | -0.030551 | -0.952763 |
| H | 2.094115 | 0.027274 | -3.397694 |
| H | -2.094115 | -0.027274 | -3.397694 |
| H | -2.291647 | -0.217338 | -5.363323 |
| H | 2.291647 | 0.217338 | -5.363323 |
| H | -2.085245 | -0.197134 | -7.808992 |
| H | 2.085245 | 0.197134 | -7.808992 |
| H | -2.292299 | 0.217700 | -9.759621 |
| H | 2.292299 | -0.217700 | -9.759621 |
| H | -2.082689 | 0.196085 | -12.226856 |
| H | 2.082689 | -0.196085 | -12.226856 |
| H | 0.000000 | 0.000000 | -13.687385 |
| B | 0.000000 | 0.000000 | -12.489268 |
| B | 1.231562 | -0.112906 | -10.311998 |
| B | -1.231562 | 0.112906 | -10.311998 |
| B | 0.000000 | 0.000000 | -8.101584 |
| B | 1.226444 | 0.112731 | -5.908793 |
| B | -1.226444 | -0.112731 | -5.908793 |
| B | 0.000000 | 0.000000 | -3.692312 |
| B | 1.231205 | 0.016377 | -1.498024 |
| B | -1.231205 | -0.016377 | -1.498024 |
| B | 0.000000 | 0.000000 | 0.719290 |
| B | 1.231006 | -0.016228 | 2.914169 |
| B | -1.231006 | 0.016228 | 2.914169 |
| B | 0.000000 | 0.000000 | 5.131890 |
| B | 1.223504 | -0.128917 | 7.327162 |
| B | -1.223504 | 0.128917 | 7.327162 |
| B | 0.000000 | 0.000000 | 9.548035 |
| B | 1.241560 | 0.130021 | 11.735281 |
| B | -1.241560 | -0.130021 | 11.735281 |
| N | 1.205402 | -0.111201 | -11.734399 |
| N | -1.205402 | 0.111201 | -11.734399 |
| N | 0.000000 | 0.000000 | -9.568946 |
| N | 1.202278 | 0.109798 | -7.327403 |
| N | -1.202278 | -0.109798 | -7.327403 |
| N | 0.000000 | 0.000000 | -5.156621 |
| N | 1.207052 | 0.016499 | -2.915916 |
| N | -1.207052 | -0.016499 | -2.915916 |
| N | 0.000000 | 0.000000 | -0.744697 |
| N | 1.207017 | -0.015595 | 1.496135 |
| N | -1.207017 | 0.015595 | 1.496135 |
| N | 0.000000 | 0.000000 | 3.667161 |
| N | 1.200391 | -0.126515 | 5.907967 |
| N | -1.200391 | 0.126515 | 5.907967 |
| N | 0.000000 | 0.000000 | 8.078875 |
| N | 1.209166 | 0.126680 | 10.312041 |
| N | -1.209166 | -0.126680 | 10.312041 |
| N | 0.000000 | 0.000000 | 12.428314 |

**Supplementary Table 31 |** Nuclear coordinates of S0 geometry of **6f: [7]PP-BN** at the PBE0/6-31G(d) level of theory.

| Element Symbol | (Å) | (Å) | (Å) |
| --- | --- | --- | --- |
| H | 2.300478 | 0.017869 | 10.080106 |
| H | -2.300478 | -0.017869 | 10.080106 |
| H | 2.093778 | 0.018773 | 7.632306 |
| H | -2.093778 | -0.018773 | 7.632306 |
| H | -2.048509 | -0.438871 | 12.023292 |
| H | 2.048509 | 0.438871 | 12.023292 |
| H | -2.241277 | -0.477614 | 14.537251 |
| H | 2.241277 | 0.477614 | 14.537251 |
| H | 0.000000 | 0.000000 | 15.643909 |
| H | -2.301530 | 0.046961 | 5.664642 |
| H | 2.301530 | -0.046961 | 5.664642 |
| H | -2.093486 | 0.042488 | 3.219318 |
| H | 2.093486 | -0.042488 | 3.219318 |
| H | 2.302129 | -0.010952 | 1.252624 |
| H | -2.302129 | 0.010952 | 1.252624 |
| H | 2.094013 | -0.010215 | -1.192725 |
| H | -2.094013 | 0.010215 | -1.192725 |
| H | -2.299812 | 0.102980 | -3.158849 |
| H | 2.299812 | -0.102980 | -3.158849 |
| H | -2.092194 | 0.093480 | -5.604039 |
| H | 2.092194 | -0.093480 | -5.604039 |
| H | 2.301574 | 0.047218 | -7.569862 |
| H | -2.301574 | -0.047218 | -7.569862 |
| H | 2.094103 | 0.042347 | -10.015282 |
| H | -2.094103 | -0.042347 | -10.015282 |
| H | -2.269491 | 0.389153 | -11.965780 |
| H | 2.269491 | -0.389153 | -11.965780 |
| H | -2.062062 | 0.352008 | -14.433091 |
| H | 2.062062 | -0.352008 | -14.433091 |
| H | 0.000000 | 0.000000 | -15.893563 |
| B | 0.000000 | 0.000000 | -14.695473 |
| B | 1.219661 | -0.205046 | -12.518246 |
| B | -1.219661 | 0.205046 | -12.518246 |
| B | 0.000000 | 0.000000 | -10.307966 |
| B | 1.231458 | 0.022065 | -8.115176 |
| B | -1.231458 | -0.022065 | -8.115176 |
| B | 0.000000 | 0.000000 | -5.898740 |
| B | 1.230334 | -0.053557 | -3.704490 |
| B | -1.230334 | 0.053557 | -3.704490 |
| B | 0.000000 | 0.000000 | -1.487731 |
| B | 1.231357 | -0.006594 | 0.707015 |
| B | -1.231357 | 0.006594 | 0.707015 |
| B | 0.000000 | 0.000000 | 2.924196 |
| B | 1.230766 | -0.024193 | 5.119312 |
| B | -1.230766 | 0.024193 | 5.119312 |
| B | 0.000000 | 0.000000 | 7.337518 |
| B | 1.230002 | 0.013843 | 9.533159 |
| B | -1.230002 | -0.013843 | 9.533159 |
| B | 0.000000 | 0.000000 | 11.754493 |
| B | 1.221119 | 0.258973 | 13.941976 |
| B | -1.221119 | -0.258973 | 13.941976 |
| N | 1.193649 | -0.201461 | -13.940590 |
| N | -1.193649 | 0.201461 | -13.940590 |
| N | 0.000000 | 0.000000 | -11.775160 |
| N | 1.207102 | 0.020794 | -9.533647 |
| N | -1.207102 | -0.020794 | -9.533647 |
| N | 0.000000 | 0.000000 | -7.362798 |
| N | 1.206082 | -0.052341 | -5.122123 |
| N | -1.206082 | 0.052341 | -5.122123 |
| N | 0.000000 | 0.000000 | -2.951028 |
| N | 1.207147 | -0.006652 | -0.710453 |
| N | -1.207147 | 0.006652 | -0.710453 |
| N | 0.000000 | 0.000000 | 1.460749 |
| N | 1.206805 | -0.023765 | 3.701512 |
| N | -1.206805 | 0.023765 | 3.701512 |
| N | 0.000000 | 0.000000 | 5.872887 |
| N | 1.206797 | 0.013163 | 8.114115 |
| N | -1.206797 | -0.013163 | 8.114115 |
| N | 0.000000 | 0.000000 | 10.285392 |
| N | 1.189244 | 0.252296 | 12.518795 |
| N | -1.189244 | -0.252296 | 12.518795 |
| N | 0.000000 | 0.000000 | 14.635151 |

**Supplementary Table 32 |** Nuclear coordinates of S0 geometry of **6g: [8]PP-BN** at the PBE0/6-31G(d) level of theory.

| Element Symbol | (Å) | (Å) | (Å) |
| --- | --- | --- | --- |
| H | -2.297734 | 0.113511 | 12.285475 |
| H | -2.091378 | 0.101284 | 9.837203 |
| H | 2.091378 | -0.101284 | 9.837203 |
| H | 2.297734 | -0.113511 | 12.285475 |
| H | -2.301059 | -0.060634 | 7.870917 |
| H | 2.301059 | 0.060634 | 7.870917 |
| H | -2.093179 | -0.054081 | 5.424747 |
| H | 2.093179 | 0.054081 | 5.424747 |
| H | 2.069220 | 0.327497 | 14.228093 |
| H | -2.069220 | -0.327497 | 14.228093 |
| H | 2.263834 | 0.355743 | 16.742163 |
| H | -2.263834 | -0.355743 | 16.742163 |
| H | 0.000000 | 0.000000 | 17.848784 |
| H | 2.302040 | -0.021382 | 3.458646 |
| H | -2.302040 | 0.021382 | 3.458646 |
| H | 2.093839 | -0.019091 | 1.012926 |
| H | -2.093839 | 0.019091 | 1.012926 |
| H | -2.302058 | -0.026091 | -0.953022 |
| H | 2.302058 | 0.026091 | -0.953022 |
| H | -2.093901 | -0.023519 | -3.398549 |
| H | 2.093901 | 0.023519 | -3.398549 |
| H | 2.301473 | -0.056174 | -5.364421 |
| H | -2.301473 | 0.056174 | -5.364421 |
| H | 2.093659 | -0.051012 | -7.809635 |
| H | -2.093659 | 0.051012 | -7.809635 |
| H | -2.300312 | -0.090232 | -9.775326 |
| H | 2.300312 | 0.090232 | -9.775326 |
| H | -2.092928 | -0.081563 | -12.220835 |
| H | 2.092928 | 0.081563 | -12.220835 |
| H | 2.275790 | -0.350321 | -14.171002 |
| H | -2.275790 | 0.350321 | -14.171002 |
| H | 2.067763 | -0.316795 | -16.638471 |
| H | -2.067763 | 0.316795 | -16.638471 |
| H | 0.000000 | 0.000000 | -18.098871 |
| B | 0.000000 | 0.000000 | -16.900795 |
| B | -1.223035 | 0.184175 | -14.723606 |
| B | 1.223035 | -0.184175 | -14.723606 |
| B | 0.000000 | 0.000000 | -12.513451 |
| B | -1.230884 | -0.045123 | -10.320702 |
| B | 1.230884 | 0.045123 | -10.320702 |
| B | 0.000000 | 0.000000 | -8.104379 |
| B | -1.231240 | 0.028663 | -5.910145 |
| B | 1.231240 | -0.028663 | -5.910145 |
| B | 0.000000 | 0.000000 | -3.693576 |
| B | -1.231478 | -0.013154 | -1.498893 |
| B | 1.231478 | 0.013154 | -1.498893 |
| B | 0.000000 | 0.000000 | 0.717831 |
| B | -1.231385 | 0.010430 | 2.912747 |
| B | 1.231385 | -0.010430 | 2.912747 |
| B | 0.000000 | 0.000000 | 5.129814 |
| B | -1.230771 | -0.030338 | 7.324921 |
| B | 1.230771 | 0.030338 | 7.324921 |
| B | 0.000000 | 0.000000 | 9.542740 |
| B | -1.228922 | 0.055537 | 11.738278 |
| B | 1.228922 | -0.055537 | 11.738278 |
| B | 0.000000 | 0.000000 | 13.959427 |
| B | -1.233359 | -0.192561 | 16.146855 |
| B | 1.233359 | 0.192561 | 16.146855 |
| N | -1.196938 | 0.181064 | -16.145919 |
| N | 1.196938 | -0.181064 | -16.145919 |
| N | 0.000000 | 0.000000 | -13.980549 |
| N | -1.206525 | -0.043422 | -11.739108 |
| N | 1.206525 | 0.043422 | -11.739108 |
| N | 0.000000 | 0.000000 | -9.568288 |
| N | -1.206916 | 0.027984 | -7.327655 |
| N | 1.206916 | -0.027984 | -7.327655 |
| N | 0.000000 | 0.000000 | -5.156584 |
| N | -1.207158 | -0.012778 | -2.916122 |
| N | 1.207158 | 0.012778 | -2.916122 |
| N | 0.000000 | 0.000000 | -0.745012 |
| N | -1.207145 | 0.010253 | 1.495463 |
| N | 1.207145 | -0.010253 | 1.495463 |
| N | 0.000000 | 0.000000 | 3.666604 |
| N | -1.206765 | -0.029675 | 5.907199 |
| N | 1.206765 | 0.029675 | 5.907199 |
| N | 0.000000 | 0.000000 | 8.078317 |
| N | -1.205729 | 0.054556 | 10.319260 |
| N | 1.205729 | -0.054556 | 10.319260 |
| N | 0.000000 | 0.000000 | 12.490385 |
| N | -1.201176 | -0.187606 | 14.723693 |
| N | 1.201176 | 0.187606 | 14.723693 |
| N | 0.000000 | 0.000000 | 16.840028 |

**Supplementary Table 33 |** Nuclear coordinates of S0 geometry of **6h: [9]PP-BN** at the PBE0/6-31G(d) level of theory.

| Element Symbol | (Å) | (Å) | (Å) |
| --- | --- | --- | --- |
| H | 2.297661 | 0.114236 | 14.491387 |
| H | 2.091330 | 0.101879 | 12.042887 |
| H | -2.091330 | -0.101879 | 12.042887 |
| H | -2.297661 | -0.114236 | 14.491387 |
| H | 2.300939 | -0.064712 | 10.076780 |
| H | -2.300939 | 0.064712 | 10.076780 |
| H | 2.093052 | -0.057690 | 7.630518 |
| H | -2.093052 | 0.057690 | 7.630518 |
| H | -2.068490 | 0.331944 | 16.433661 |
| H | 2.068490 | -0.331944 | 16.433661 |
| H | -2.263066 | 0.360607 | 18.947826 |
| H | 2.263066 | -0.360607 | 18.947826 |
| H | 0.000000 | 0.000000 | 20.054405 |
| H | -2.302119 | 0.017243 | 5.664354 |
| H | 2.302119 | -0.017243 | 5.664354 |
| H | -2.093796 | 0.015988 | 3.218597 |
| H | 2.093796 | -0.015988 | 3.218597 |
| H | 2.302157 | -0.019650 | 1.252798 |
| H | -2.302157 | 0.019650 | 1.252798 |
| H | 2.093832 | -0.017833 | -1.192950 |
| H | -2.093832 | 0.017833 | -1.192950 |
| H | -2.302216 | 0.010995 | -3.158663 |
| H | 2.302216 | -0.010995 | -3.158663 |
| H | -2.093996 | 0.010029 | -5.604207 |
| H | 2.093996 | -0.010029 | -5.604207 |
| H | 2.302182 | -0.008646 | -7.570285 |
| H | -2.302182 | 0.008646 | -7.570285 |
| H | 2.094263 | -0.007679 | -10.015198 |
| H | -2.094263 | 0.007679 | -10.015198 |
| H | -2.302102 | 0.024370 | -11.981888 |
| H | 2.302102 | -0.024370 | -11.981888 |
| H | -2.094385 | 0.022279 | -14.426772 |
| H | 2.094385 | -0.022279 | -14.426772 |
| B | 0.000000 | 0.000000 | -14.719655 |
| B | 1.231575 | -0.011293 | -12.526808 |
| B | -1.231575 | 0.011293 | -12.526808 |
| B | 0.000000 | 0.000000 | -10.310241 |
| B | 1.231533 | -0.004684 | -8.115898 |
| B | -1.231533 | 0.004684 | -8.115898 |
| B | 0.000000 | 0.000000 | -5.899307 |
| B | 1.231603 | -0.005959 | -3.704622 |
| B | -1.231603 | 0.005959 | -3.704622 |
| B | 0.000000 | 0.000000 | -1.488087 |
| B | 1.231542 | -0.010455 | 0.706776 |
| B | -1.231542 | 0.010455 | 0.706776 |
| B | 0.000000 | 0.000000 | 2.923445 |
| B | 1.231401 | -0.009709 | 5.118451 |
| B | -1.231401 | 0.009709 | 5.118451 |
| B | 0.000000 | 0.000000 | 7.335531 |
| B | 1.230725 | -0.032583 | 9.530696 |
| B | -1.230725 | 0.032583 | 9.530696 |
| B | 0.000000 | 0.000000 | 11.748477 |
| B | 1.228946 | 0.055855 | 13.944015 |
| B | -1.228946 | -0.055855 | 13.944015 |
| B | 0.000000 | 0.000000 | 16.165065 |
| B | 1.232959 | -0.195199 | 18.352482 |
| B | -1.232959 | 0.195199 | 18.352482 |
| N | 1.207190 | -0.010103 | -13.945148 |
| N | -1.207190 | 0.010103 | -13.945148 |
| N | 0.000000 | 0.000000 | -11.774116 |
| N | 1.207181 | -0.004541 | -9.533316 |
| N | -1.207181 | 0.004541 | -9.533316 |
| N | 0.000000 | 0.000000 | -7.362151 |
| N | 1.207227 | -0.005811 | -5.121708 |
| N | -1.207227 | 0.005811 | -5.121708 |
| N | 0.000000 | 0.000000 | -2.950614 |
| N | 1.207194 | -0.010210 | -0.710247 |
| N | -1.207194 | 0.010210 | -0.710247 |
| N | 0.000000 | 0.000000 | 1.460853 |
| N | 1.207153 | -0.009486 | 3.701278 |
| N | -1.207153 | 0.009486 | 3.701278 |
| N | 0.000000 | 0.000000 | 5.872441 |
| N | 1.206710 | -0.031915 | 8.113035 |
| N | -1.206710 | 0.031915 | 8.113035 |
| N | 0.000000 | 0.000000 | 10.284140 |
| N | 1.205741 | 0.054829 | 12.525031 |
| N | -1.205741 | -0.054829 | 12.525031 |
| N | 0.000000 | 0.000000 | 14.696093 |
| N | 1.200788 | -0.190181 | 16.929336 |
| N | -1.200788 | 0.190181 | 16.929336 |
| N | 0.000000 | 0.000000 | 19.045650 |
| H | 2.267124 | 0.403009 | -16.377476 |
| H | -2.267124 | -0.403009 | -16.377476 |
| H | 2.059860 | 0.364623 | -18.844690 |
| H | -2.059860 | -0.364623 | -18.844690 |
| H | 0.000000 | 0.000000 | -20.305139 |
| B | 1.218403 | 0.212537 | -16.929885 |
| B | -1.218403 | -0.212537 | -16.929885 |
| B | 0.000000 | 0.000000 | -19.107080 |
| N | 0.000000 | 0.000000 | -16.186703 |
| N | 1.192391 | 0.208785 | -18.352162 |
| N | -1.192391 | -0.208785 | -18.352162 |

**Supplementary Table 34 |** Nuclear coordinates of S0 geometry of **6i: [10]PP-BN** at the PBE0/6-31G(d) level of theory.

| Element Symbol | (Å) | (Å) | (Å) |
| --- | --- | --- | --- |
| H | 2.297539 | 0.117403 | 16.696607 |
| H | 2.091172 | 0.104742 | 14.248175 |
| H | -2.091172 | -0.104742 | 14.248175 |
| H | -2.297539 | -0.117403 | 16.696607 |
| H | 2.300849 | -0.067517 | 12.282217 |
| H | -2.300849 | 0.067517 | 12.282217 |
| H | 2.092962 | -0.060206 | 9.835825 |
| H | -2.092962 | 0.060206 | 9.835825 |
| H | -2.069599 | 0.324939 | 18.639064 |
| H | 2.069599 | -0.324939 | 18.639064 |
| H | -2.264268 | 0.352961 | 21.153199 |
| H | 2.264268 | -0.352961 | 21.153199 |
| H | 0.000000 | 0.000000 | 22.259801 |
| H | -2.302176 | 0.004622 | 7.869843 |
| H | 2.302176 | -0.004622 | 7.869843 |
| H | -2.093822 | 0.004585 | 5.423956 |
| H | 2.093822 | -0.004585 | 5.423956 |
| H | 2.302253 | -0.004557 | 3.458313 |
| H | -2.302253 | 0.004557 | 3.458313 |
| H | 2.093847 | -0.004085 | 1.012413 |
| H | -2.093847 | 0.004085 | 1.012413 |
| H | -2.302261 | -0.007007 | -0.953028 |
| H | 2.302261 | 0.007007 | -0.953028 |
| H | -2.093897 | -0.006378 | -3.398868 |
| H | 2.093897 | 0.006378 | -3.398868 |
| H | 2.302155 | 0.022135 | -5.364398 |
| H | -2.302155 | -0.022135 | -5.364398 |
| H | 2.093934 | 0.020083 | -7.809971 |
| H | -2.093934 | -0.020083 | -7.809971 |
| H | -2.301735 | -0.048173 | -9.775862 |
| H | 2.301735 | 0.048173 | -9.775862 |
| H | -2.093822 | -0.043967 | -12.220970 |
| H | 2.093822 | 0.043967 | -12.220970 |
| B | 0.000000 | 0.000000 | -12.515791 |
| B | 1.231370 | 0.024975 | -10.321565 |
| B | -1.231370 | -0.024975 | -10.321565 |
| B | 0.000000 | 0.000000 | -8.105103 |
| B | 1.231610 | 0.011780 | -5.910432 |
| B | -1.231610 | -0.011780 | -5.910432 |
| B | 0.000000 | 0.000000 | -3.694023 |
| B | 1.231672 | 0.003692 | -1.499190 |
| B | -1.231672 | -0.003692 | -1.499190 |
| B | 0.000000 | 0.000000 | 0.717247 |
| B | 1.231617 | -0.002397 | 2.912182 |
| B | -1.231617 | 0.002397 | 2.912182 |
| B | 0.000000 | 0.000000 | 5.128797 |
| B | 1.231462 | -0.003114 | 7.323838 |
| B | -1.231462 | 0.003114 | 7.323838 |
| B | 0.000000 | 0.000000 | 9.540863 |
| B | 1.230715 | -0.033964 | 11.736036 |
| B | -1.230715 | 0.033964 | 11.736036 |
| B | 0.000000 | 0.000000 | 13.953756 |
| B | 1.228861 | 0.057551 | 16.149309 |
| B | -1.228861 | -0.057551 | 16.149309 |
| B | 0.000000 | 0.000000 | 18.370403 |
| B | 1.233599 | -0.191041 | 20.557854 |
| B | -1.233599 | 0.191041 | 20.557854 |
| N | 1.207013 | 0.024288 | -11.738948 |
| N | -1.207013 | -0.024288 | -11.738948 |
| N | 0.000000 | 0.000000 | -9.567855 |
| N | 1.207203 | 0.011635 | -7.327448 |
| N | -1.207203 | -0.011635 | -7.327448 |
| N | 0.000000 | 0.000000 | -5.156376 |
| N | 1.207265 | 0.003693 | -2.916081 |
| N | -1.207265 | -0.003693 | -2.916081 |
| N | 0.000000 | 0.000000 | -0.745027 |
| N | 1.207251 | -0.002294 | 1.495265 |
| N | -1.207251 | 0.002294 | 1.495265 |
| N | 0.000000 | 0.000000 | 3.666345 |
| N | 1.207199 | -0.003001 | 5.906726 |
| N | -1.207199 | 0.003001 | 5.906726 |
| N | 0.000000 | 0.000000 | 8.077863 |
| N | 1.206690 | -0.033240 | 10.318412 |
| N | -1.206690 | 0.033240 | 10.318412 |
| N | 0.000000 | 0.000000 | 12.489484 |
| N | 1.205661 | 0.056471 | 14.730350 |
| N | -1.205661 | -0.056471 | 14.730350 |
| N | 0.000000 | 0.000000 | 16.901444 |
| N | 1.201414 | -0.186124 | 19.134722 |
| N | -1.201414 | 0.186124 | 19.134722 |
| N | 0.000000 | 0.000000 | 21.251048 |
| H | 2.300266 | -0.092533 | -14.186657 |
| H | -2.300266 | 0.092533 | -14.186657 |
| H | 2.092880 | -0.084080 | -16.631994 |
| H | -2.092880 | 0.084080 | -16.631994 |
| H | 2.277966 | 0.336275 | -18.582532 |
| H | -2.277966 | -0.336275 | -18.582532 |
| H | 2.069706 | 0.303808 | -21.049831 |
| H | -2.069706 | -0.303808 | -21.049831 |
| H | 0.000000 | 0.000000 | -22.510239 |
| B | -1.230842 | 0.046505 | -14.732043 |
| B | 1.230842 | -0.046505 | -14.732043 |
| B | 0.000000 | 0.000000 | -16.924857 |
| B | 1.224118 | 0.176652 | -19.134986 |
| B | -1.224118 | -0.176652 | -19.134986 |
| B | 0.000000 | 0.000000 | -21.312181 |
| N | 0.000000 | 0.000000 | -13.979530 |
| N | -1.206482 | 0.045042 | -16.150360 |
| N | 1.206482 | -0.045042 | -16.150360 |
| N | 0.000000 | 0.000000 | -18.391855 |
| N | 1.198041 | 0.173569 | -20.557276 |
| N | -1.198041 | -0.173569 | -20.557276 |

**Supplementary Table 35 |** Nuclear coordinates of S0 geometry of **6j: [11]PP-BN** at the PBE0/6-31G(d) level of theory.

| Element Symbol | (Å) | (Å) | (Å) |
| --- | --- | --- | --- |
| H | 2.297765 | 0.112160 | 18.902236 |
| H | 2.091402 | 0.099989 | 16.453666 |
| H | -2.091402 | -0.099989 | 16.453666 |
| H | -2.297765 | -0.112160 | 18.902236 |
| H | 2.300846 | -0.068122 | 14.487679 |
| H | -2.300846 | 0.068122 | 14.487679 |
| H | 2.092933 | -0.060791 | 12.041311 |
| H | -2.092933 | 0.060791 | 12.041311 |
| H | -2.068149 | 0.333977 | 20.844438 |
| H | 2.068149 | -0.333977 | 20.844438 |
| H | -2.262707 | 0.362842 | 23.358642 |
| H | 2.262707 | -0.362842 | 23.358642 |
| H | 0.000000 | 0.000000 | 24.465208 |
| H | -2.302152 | 0.013728 | 10.075331 |
| H | 2.302152 | -0.013728 | 10.075331 |
| H | -2.093767 | 0.012837 | 7.629411 |
| H | 2.093767 | -0.012837 | 7.629411 |
| H | 2.302194 | -0.018133 | 5.663863 |
| H | -2.302194 | 0.018133 | 5.663863 |
| H | 2.093751 | -0.016441 | 3.217865 |
| H | -2.093751 | 0.016441 | 3.217865 |
| H | -2.302268 | 0.009387 | 1.252586 |
| H | 2.302268 | -0.009387 | 1.252586 |
| H | -2.093824 | 0.008560 | -1.193427 |
| H | 2.093824 | -0.008560 | -1.193427 |
| H | 2.302287 | 0.001806 | -3.158664 |
| H | -2.302287 | -0.001806 | -3.158664 |
| H | 2.093897 | 0.001633 | -5.604575 |
| H | -2.093897 | -0.001633 | -5.604575 |
| H | -2.302188 | -0.019296 | -7.569970 |
| H | 2.302188 | 0.019296 | -7.569970 |
| H | -2.093944 | -0.017460 | -10.015616 |
| H | 2.093944 | 0.017460 | -10.015616 |
| B | 0.000000 | 0.000000 | -10.310703 |
| B | 1.231654 | 0.010311 | -8.116053 |
| B | -1.231654 | -0.010311 | -8.116053 |
| B | 0.000000 | 0.000000 | -5.899710 |
| B | 1.231725 | 0.000917 | -3.704899 |
| B | -1.231725 | -0.000917 | -3.704899 |
| B | 0.000000 | 0.000000 | -1.488577 |
| B | 1.231700 | -0.005068 | 0.706319 |
| B | -1.231700 | 0.005068 | 0.706319 |
| B | 0.000000 | 0.000000 | 2.922705 |
| B | 1.231602 | -0.009624 | 5.117671 |
| B | -1.231602 | 0.009624 | 5.117671 |
| B | 0.000000 | 0.000000 | 7.334253 |
| B | 1.231449 | -0.007914 | 9.529312 |
| B | -1.231449 | 0.007914 | 9.529312 |
| B | 0.000000 | 0.000000 | 11.746328 |
| B | 1.230700 | -0.034369 | 13.941521 |
| B | -1.230700 | 0.034369 | 13.941521 |
| B | 0.000000 | 0.000000 | 16.159260 |
| B | 1.229010 | 0.054740 | 18.354816 |
| B | -1.229010 | -0.054740 | 18.354816 |
| B | 0.000000 | 0.000000 | 20.575841 |
| B | 1.232768 | -0.196419 | 22.763273 |
| B | -1.232768 | 0.196419 | 22.763273 |
| N | 1.207232 | 0.010228 | -9.533029 |
| N | -1.207232 | -0.010228 | -9.533029 |
| N | 0.000000 | 0.000000 | -7.361979 |
| N | 1.207290 | 0.000969 | -5.121720 |
| N | -1.207290 | -0.000969 | -5.121720 |
| N | 0.000000 | 0.000000 | -2.950693 |
| N | 1.207279 | -0.004921 | -0.710470 |
| N | -1.207279 | 0.004921 | -0.710470 |
| N | 0.000000 | 0.000000 | 1.460560 |
| N | 1.207228 | -0.009401 | 3.700811 |
| N | -1.207228 | 0.009401 | 3.700811 |
| N | 0.000000 | 0.000000 | 5.871876 |
| N | 1.207183 | -0.007728 | 8.112235 |
| N | -1.207183 | 0.007728 | 8.112235 |
| N | 0.000000 | 0.000000 | 10.283371 |
| N | 1.206675 | -0.033657 | 12.523918 |
| N | -1.206675 | 0.033657 | 12.523918 |
| N | 0.000000 | 0.000000 | 14.695005 |
| N | 1.205798 | 0.053735 | 16.935868 |
| N | -1.205798 | -0.053735 | 16.935868 |
| N | 0.000000 | 0.000000 | 19.106919 |
| N | 1.200602 | -0.191374 | 21.340147 |
| N | -1.200602 | 0.191374 | 21.340147 |
| N | 0.000000 | 0.000000 | 23.456456 |
| H | 2.301256 | 0.066708 | -11.981337 |
| H | -2.301256 | -0.066708 | -11.981337 |
| H | 2.093384 | 0.060719 | -14.426551 |
| H | -2.093384 | -0.060719 | -14.426551 |
| H | -2.300898 | 0.074377 | -16.392126 |
| H | 2.300898 | -0.074377 | -16.392126 |
| H | -2.093455 | 0.067089 | -18.837569 |
| H | 2.093455 | -0.067089 | -18.837569 |
| H | 2.275056 | 0.355513 | -20.788079 |
| H | -2.275056 | -0.355513 | -20.788079 |
| H | 2.067044 | 0.321427 | -23.255330 |
| H | -2.067044 | -0.321427 | -23.255330 |
| H | 0.000000 | 0.000000 | -24.715758 |
| B | -1.231158 | -0.034661 | -12.527109 |
| B | 1.231158 | 0.034661 | -12.527109 |
| B | 0.000000 | 0.000000 | -14.721325 |
| B | -1.231188 | 0.036690 | -16.937550 |
| B | 1.231188 | -0.036690 | -16.937550 |
| B | 0.000000 | 0.000000 | -19.130332 |
| B | 1.222589 | 0.187019 | -21.340521 |
| B | -1.222589 | -0.187019 | -21.340521 |
| B | 0.000000 | 0.000000 | -23.517709 |
| N | 0.000000 | 0.000000 | -11.773404 |
| N | -1.206792 | -0.033805 | -13.944470 |
| N | 1.206792 | 0.033805 | -13.944470 |
| N | 0.000000 | 0.000000 | -16.185038 |
| N | -1.206799 | 0.035135 | -18.355865 |
| N | 1.206799 | -0.035135 | -18.355865 |
| N | 0.000000 | 0.000000 | -20.597343 |
| N | 1.196509 | 0.183792 | -22.762787 |
| N | -1.196509 | -0.183792 | -22.762787 |

**Supplementary Table 36 |** Nuclear coordinates of S0 geometry of **6k: [12]PP-BN** at the PBE0/6-31G(d) level of theory.

| Element Symbol | (Å) | (Å) | (Å) |
| --- | --- | --- | --- |
| H | -2.297367 | -0.120455 | 21.107669 |
| H | -2.091021 | -0.107537 | 18.659171 |
| H | 2.091021 | 0.107537 | 18.659171 |
| H | 2.297367 | 0.120455 | 21.107669 |
| H | -2.301207 | 0.055148 | 16.693114 |
| H | 2.301207 | -0.055148 | 16.693114 |
| H | -2.093236 | 0.049000 | 14.246780 |
| H | 2.093236 | -0.049000 | 14.246780 |
| H | 2.069759 | -0.323837 | 23.049993 |
| H | -2.069759 | 0.323837 | 23.049993 |
| H | 2.264454 | -0.351767 | 25.564182 |
| H | -2.264454 | 0.351767 | 25.564182 |
| H | 0.000000 | 0.000000 | 26.670761 |
| H | 2.302175 | -0.011178 | 12.280787 |
| H | -2.302175 | 0.011178 | 12.280787 |
| H | 2.093768 | -0.010455 | 9.834852 |
| H | -2.093768 | 0.010455 | 9.834852 |
| H | -2.302229 | 0.013785 | 7.869368 |
| H | 2.302229 | -0.013785 | 7.869368 |
| H | -2.093759 | 0.012496 | 5.423307 |
| H | 2.093759 | -0.012496 | 5.423307 |
| H | 2.302287 | -0.005935 | 3.458134 |
| H | -2.302287 | 0.005935 | 3.458134 |
| H | 2.093801 | -0.005420 | 1.012022 |
| H | -2.093801 | 0.005420 | 1.012022 |
| H | -2.302294 | 0.006135 | -0.953052 |
| H | 2.302294 | -0.006135 | -0.953052 |
| H | -2.093829 | 0.005535 | -3.399128 |
| H | 2.093829 | -0.005535 | -3.399128 |
| H | 2.302295 | 0.000339 | -5.364249 |
| H | -2.302295 | -0.000339 | -5.364249 |
| H | 2.093892 | 0.000369 | -7.810196 |
| H | -2.093892 | -0.000369 | -7.810196 |
| B | 0.000000 | 0.000000 | -8.105338 |
| B | -1.231752 | -0.000150 | -5.910531 |
| B | 1.231752 | 0.000150 | -5.910531 |
| B | 0.000000 | 0.000000 | -3.694276 |
| B | -1.231755 | 0.003247 | -1.499397 |
| B | 1.231755 | -0.003247 | -1.499397 |
| B | 0.000000 | 0.000000 | 0.716870 |
| B | -1.231727 | 0.003256 | 2.911799 |
| B | 1.231727 | -0.003256 | 2.911799 |
| B | 0.000000 | 0.000000 | 5.128150 |
| B | -1.231632 | 0.007318 | 7.323132 |
| B | 1.231632 | -0.007318 | 7.323132 |
| B | 0.000000 | 0.000000 | 9.539688 |
| B | -1.231464 | 0.006431 | 11.734760 |
| B | 1.231464 | -0.006431 | 11.734760 |
| B | 0.000000 | 0.000000 | 13.951770 |
| B | -1.230869 | 0.027515 | 16.146979 |
| B | 1.230869 | -0.027515 | 16.146979 |
| B | 0.000000 | 0.000000 | 18.364731 |
| B | -1.228790 | -0.059214 | 20.560304 |
| B | 1.228790 | 0.059214 | 20.560304 |
| B | 0.000000 | 0.000000 | 22.781364 |
| B | -1.233707 | 0.190388 | 24.968813 |
| B | 1.233707 | -0.190388 | 24.968813 |
| N | -1.207300 | -0.000212 | -7.327308 |
| N | 1.207300 | 0.000212 | -7.327308 |
| N | 0.000000 | 0.000000 | -5.156296 |
| N | -1.207304 | 0.003144 | -2.916113 |
| N | 1.207304 | -0.003144 | -2.916113 |
| N | 0.000000 | 0.000000 | -0.745109 |
| N | -1.207296 | 0.003170 | 1.495070 |
| N | 1.207296 | -0.003170 | 1.495070 |
| N | 0.000000 | 0.000000 | 3.666084 |
| N | -1.207251 | 0.007140 | 5.906310 |
| N | 1.207251 | -0.007140 | 5.906310 |
| N | 0.000000 | 0.000000 | 8.077363 |
| N | -1.207194 | 0.006282 | 10.317707 |
| N | 1.207194 | -0.006282 | 10.317707 |
| N | 0.000000 | 0.000000 | 12.488844 |
| N | -1.206840 | 0.026951 | 14.729394 |
| N | 1.206840 | -0.026951 | 14.729394 |
| N | 0.000000 | 0.000000 | 16.900495 |
| N | -1.205585 | -0.058132 | 19.141369 |
| N | 1.205585 | 0.058132 | 19.141369 |
| N | 0.000000 | 0.000000 | 21.312446 |
| N | -1.201520 | 0.185493 | 23.545695 |
| N | 1.201520 | -0.185493 | 23.545695 |
| N | 0.000000 | 0.000000 | 25.662009 |
| H | -2.302270 | -0.005314 | -9.775516 |
| H | 2.302270 | 0.005314 | -9.775516 |
| H | -2.093999 | -0.004803 | -12.221221 |
| H | 2.093999 | 0.004803 | -12.221221 |
| H | 2.301398 | 0.061428 | -14.186812 |
| H | -2.301398 | -0.061428 | -14.186812 |
| H | 2.093509 | 0.055829 | -16.632097 |
| H | -2.093509 | -0.055829 | -16.632097 |
| H | -2.300622 | 0.082292 | -18.597596 |
| H | 2.300622 | -0.082292 | -18.597596 |
| H | -2.093203 | 0.074279 | -21.043064 |
| H | 2.093203 | -0.074279 | -21.043064 |
| H | -2.276316 | -0.347398 | -22.993576 |
| H | 2.276316 | 0.347398 | -22.993576 |
| H | -2.068165 | -0.314080 | -25.460842 |
| H | 2.068165 | 0.314080 | -25.460842 |
| H | 0.000000 | 0.000000 | -26.921248 |
| B | 1.231716 | 0.003002 | -10.321633 |
| B | -1.231716 | -0.003002 | -10.321633 |
| B | 0.000000 | 0.000000 | -12.516269 |
| B | 1.231256 | 0.031735 | -14.732633 |
| B | -1.231256 | -0.031735 | -14.732633 |
| B | 0.000000 | 0.000000 | -16.926839 |
| B | 1.231061 | -0.040919 | -19.143046 |
| B | -1.231061 | 0.040919 | -19.143046 |
| B | 0.000000 | 0.000000 | -21.335839 |
| B | -1.223261 | -0.182661 | -23.546028 |
| B | 1.223261 | 0.182661 | -23.546028 |
| B | 0.000000 | 0.000000 | -25.723202 |
| N | 0.000000 | 0.000000 | -9.567549 |
| N | 1.207284 | 0.003068 | -11.738581 |
| N | -1.207284 | -0.003068 | -11.738581 |
| N | 0.000000 | 0.000000 | -13.978927 |
| N | 1.206878 | 0.030942 | -16.149975 |
| N | -1.206878 | -0.030942 | -16.149975 |
| N | 0.000000 | 0.000000 | -18.390522 |
| N | 1.206661 | -0.039289 | -20.561348 |
| N | -1.206661 | 0.039289 | -20.561348 |
| N | 0.000000 | 0.000000 | -22.802837 |
| N | -1.197156 | -0.179543 | -24.968279 |
| N | 1.197156 | 0.179543 | -24.968279 |

**Supplementary Table 37 |** Nuclear coordinates of S0 geometry of **7a: [3]MP-BN** at the PBE0/6-31G(d) level of theory.

| Element Symbol | (Å) | (Å) | (Å) |
| --- | --- | --- | --- |
| H | 0.708887 | 1.600647 | -1.979572 |
| H | -0.707833 | 3.796889 | 1.807010 |
| H | -0.643116 | 5.834512 | 0.396027 |
| H | 0.000179 | 6.099953 | -2.059310 |
| H | 0.643391 | 3.836773 | -3.047482 |
| H | 0.001601 | 2.089543 | 2.696568 |
| H | 0.000000 | 0.000000 | -0.933008 |
| H | 0.000000 | 0.000000 | 4.116440 |
| H | -0.001601 | -2.089543 | 2.696568 |
| H | -0.708887 | -1.600647 | -1.979572 |
| H | 0.707833 | -3.796889 | 1.807010 |
| H | -0.643391 | -3.836773 | -3.047482 |
| H | 0.643116 | -5.834512 | 0.396027 |
| H | -0.000179 | -6.099953 | -2.059310 |
| B | 0.000043 | 5.062788 | -1.457580 |
| B | -0.375040 | 3.768456 | 0.653482 |
| B | 0.375221 | 2.587390 | -1.382102 |
| B | -0.002019 | 1.262770 | 0.749802 |
| B | 0.002019 | -1.262770 | 0.749802 |
| B | 0.000000 | 0.000000 | 2.915471 |
| B | -0.375221 | -2.587390 | -1.382102 |
| B | 0.375040 | -3.768456 | 0.653482 |
| B | -0.000043 | -5.062788 | -1.457580 |
| N | -0.368954 | 4.988871 | -0.082258 |
| N | 0.000000 | 2.537496 | 0.007296 |
| N | 0.369021 | 3.832100 | -2.076025 |
| N | -0.003345 | 1.221416 | 2.182461 |
| N | 0.000000 | 0.000000 | 0.076575 |
| N | 0.003345 | -1.221416 | 2.182461 |
| N | 0.000000 | -2.537496 | 0.007296 |
| N | -0.369021 | -3.832100 | -2.076025 |
| N | 0.368954 | -4.988871 | -0.082258 |

**Supplementary Table 38 |** Nuclear coordinates of S0 geometry of **7b: [3]MP-NB** at the PBE0/6-31G(d) level of theory.

| Element Symbol | (Å) | (Å) | (Å) |
| --- | --- | --- | --- |
| H | 0.805294 | 1.786503 | -1.788589 |
| H | -0.796007 | 3.735719 | 1.558572 |
| H | -0.860269 | 6.002547 | 0.453778 |
| H | 0.009757 | 5.890463 | -1.934743 |
| H | 0.878704 | 3.868378 | -3.211389 |
| H | -0.020013 | 2.265382 | 2.838758 |
| H | 0.000000 | 0.000000 | -1.133594 |
| H | 0.000000 | 0.000000 | 3.885923 |
| H | 0.020013 | -2.265382 | 2.838758 |
| H | -0.805294 | -1.786503 | -1.788589 |
| H | 0.796007 | -3.735719 | 1.558572 |
| H | -0.878704 | -3.868378 | -3.211389 |
| H | 0.860269 | -6.002547 | 0.453778 |
| H | -0.009757 | -5.890463 | -1.934743 |
| N | 0.007040 | 5.018029 | -1.427943 |
| N | -0.455981 | 3.755749 | 0.608303 |
| N | 0.461814 | 2.622148 | -1.338382 |
| N | -0.004824 | 1.260125 | 0.759927 |
| N | 0.004824 | -1.260125 | 0.759927 |
| N | 0.000000 | 0.000000 | 2.876187 |
| N | -0.461814 | -2.622148 | -1.338382 |
| N | 0.455981 | -3.755749 | 0.608303 |
| N | -0.007040 | -5.018029 | -1.427943 |
| B | -0.465228 | 5.003389 | -0.081201 |
| B | 0.000000 | 2.533222 | 0.015232 |
| B | 0.478396 | 3.839360 | -2.080292 |
| B | -0.013743 | 1.250719 | 2.197874 |
| B | 0.000000 | 0.000000 | 0.067757 |
| B | 0.013743 | -1.250719 | 2.197874 |
| B | 0.000000 | -2.533222 | 0.015232 |
| B | -0.478396 | -3.839360 | -2.080292 |
| B | 0.465228 | -5.003389 | -0.081201 |

**Supplementary Table 39 |** Nuclear coordinates of S0 geometry of **7c: [4]MP-BN** at the PBE0/6-31G(d) level of theory.

| Element Symbol | (Å) | (Å) | (Å) |
| --- | --- | --- | --- |
| H | 3.615210 | -1.780694 | 1.050092 |
| H | 5.563232 | 1.982933 | -0.742979 |
| H | 7.712265 | 0.862584 | -0.223382 |
| H | 8.150524 | -1.411401 | 0.848892 |
| H | 5.940614 | -2.560341 | 1.403909 |
| H | 3.697848 | 2.748496 | -0.412611 |
| H | 2.009455 | -1.057252 | 0.042011 |
| H | 1.489346 | 3.880001 | -0.882263 |
| H | -0.427934 | 2.233515 | -0.835929 |
| H | 0.618806 | -2.371986 | -0.812900 |
| H | -2.027819 | 1.253699 | 0.055294 |
| H | -1.512701 | -3.669371 | -0.775030 |
| H | -3.859563 | -2.913444 | -0.390144 |
| B | 7.064471 | -0.950073 | 0.636570 |
| B | 5.613739 | 0.900631 | -0.225258 |
| B | 4.567602 | -1.124262 | 0.727317 |
| B | 3.084948 | 0.742604 | -0.143206 |
| B | 0.590949 | 0.435441 | -0.387923 |
| B | 1.612987 | 2.706416 | -0.661123 |
| B | -0.449346 | -1.864547 | -0.608842 |
| B | -1.904608 | 0.075275 | -0.142973 |
| B | -2.922923 | -2.162823 | -0.381481 |
| N | 6.893625 | 0.331597 | 0.035394 |
| N | 4.419368 | 0.173243 | 0.119814 |
| N | 5.868615 | -1.651354 | 0.970753 |
| N | 2.894353 | 2.138171 | -0.408769 |
| N | 1.906082 | -0.070180 | -0.143631 |
| N | 0.481300 | 1.840138 | -0.644292 |
| N | -0.589232 | -0.452333 | -0.380132 |
| N | -1.616772 | -2.679107 | -0.607638 |
| N | -3.079312 | -0.754967 | -0.134178 |
| H | -5.536907 | -1.722494 | -0.778693 |
| H | -3.763287 | 1.564117 | 1.123033 |
| H | -7.896819 | -0.903743 | -0.426327 |
| H | -5.956755 | 2.697272 | 1.642710 |
| H | -7.926970 | 1.326367 | 0.798628 |
| B | -4.411883 | -0.179056 | 0.123231 |
| B | -6.917429 | -0.315481 | -0.058036 |
| B | -5.859854 | 1.649179 | 1.065793 |
| N | -5.613599 | -0.842093 | -0.290812 |
| N | -7.013705 | 0.935124 | 0.622972 |
| N | -4.583841 | 1.071078 | 0.802711 |

**Supplementary Table 40 |** Nuclear coordinates of S0 geometry of **7d: [5]MP-BN** at the PBE0/6-31G(d) level of theory.

| Element Symbol | (Å) | (Å) | (Å) |
| --- | --- | --- | --- |
| H | 1.122476 | -1.461915 | 2.434701 |
| H | -0.290337 | -3.796525 | -1.234227 |
| H | 0.985021 | -5.988390 | 2.571663 |
| H | 1.408582 | -3.706160 | 3.487788 |
| H | 0.332965 | -2.063113 | -2.184984 |
| H | 0.000000 | 0.000000 | 1.444737 |
| H | 0.000000 | 0.000000 | -3.605952 |
| H | -0.332965 | 2.063113 | -2.184984 |
| H | -1.122476 | 1.461915 | 2.434701 |
| H | 0.290337 | 3.796525 | -1.234227 |
| H | -1.408582 | 3.706160 | 3.487788 |
| H | -0.985021 | 5.988390 | 2.571663 |
| B | 0.801284 | -4.986524 | 1.936856 |
| B | 0.115701 | -3.775072 | -0.103884 |
| B | 0.871576 | -2.486883 | 1.863018 |
| B | 0.192773 | -1.247074 | -0.239723 |
| B | -0.192773 | 1.247074 | -0.239723 |
| B | 0.000000 | 0.000000 | -2.405674 |
| B | -0.871576 | 2.486883 | 1.863018 |
| B | -0.115701 | 3.775072 | -0.103884 |
| B | -0.801284 | 4.986524 | 1.936856 |
| N | 0.305828 | -5.021689 | 0.587449 |
| N | 0.393474 | -2.504075 | 0.507298 |
| N | 1.066338 | -3.724519 | 2.538026 |
| N | 0.186531 | -1.206927 | -1.671343 |
| N | 0.000000 | 0.000000 | 0.434923 |
| N | -0.186531 | 1.206927 | -1.671343 |
| N | -0.393474 | 2.504075 | 0.507298 |
| N | -1.066338 | 3.724519 | 2.538026 |
| N | -0.305828 | 5.021689 | 0.587449 |
| H | -1.216563 | 7.518854 | 1.159916 |
| H | 1.330745 | 5.553427 | -1.526124 |
| H | -0.814099 | 9.805799 | 0.174881 |
| H | 1.961790 | 7.654687 | -2.771187 |
| H | 0.799869 | 9.694172 | -1.789190 |
| B | 0.000000 | 6.306157 | -0.069348 |
| B | -0.304169 | 8.798067 | -0.231468 |
| B | 1.205318 | 7.625063 | -1.839846 |
| N | -0.577551 | 7.539160 | 0.378716 |
| N | 0.591872 | 8.813845 | -1.342242 |
| N | 0.891470 | 6.396928 | -1.187718 |
| H | 1.216563 | -7.518854 | 1.159916 |
| H | -1.330745 | -5.553427 | -1.526124 |
| H | 0.814099 | -9.805799 | 0.174881 |
| H | -1.961790 | -7.654687 | -2.771187 |
| H | -0.799869 | -9.694172 | -1.789190 |
| B | 0.000000 | -6.306157 | -0.069348 |
| B | 0.304169 | -8.798067 | -0.231468 |
| B | -1.205318 | -7.625063 | -1.839846 |
| N | 0.577551 | -7.539160 | 0.378716 |
| N | -0.891470 | -6.396928 | -1.187718 |
| N | -0.591872 | -8.813845 | -1.342242 |

**Supplementary Table 41 |** Nuclear coordinates of S0 geometry of **7e: [5]MP-NB** at the PBE0/6-31G(d) level of theory.

| Element Symbol | (Å) | (Å) | (Å) |
| --- | --- | --- | --- |
| H | -1.092574 | -1.636228 | -2.290151 |
| H | 0.225463 | -3.794719 | 1.047795 |
| H | -0.927759 | -5.809953 | -2.437943 |
| H | -1.491714 | -3.696115 | -3.700257 |
| H | -0.332049 | -2.240922 | 2.333813 |
| H | 0.000000 | 0.000000 | -1.638420 |
| H | 0.000000 | 0.000000 | 3.380324 |
| H | 0.332049 | 2.240922 | 2.333813 |
| H | 1.092574 | 1.636228 | -2.290151 |
| H | -0.225463 | 3.794719 | 1.047795 |
| H | 1.491714 | 3.696115 | -3.700257 |
| H | 0.927759 | 5.809953 | -2.437943 |
| N | -0.789789 | -4.953357 | -1.922902 |
| N | -0.118291 | -3.775625 | 0.098616 |
| N | -0.875037 | -2.513507 | -1.841515 |
| N | -0.190279 | -1.245850 | 0.254820 |
| N | 0.190279 | 1.245850 | 0.254820 |
| N | 0.000000 | 0.000000 | 2.370679 |
| N | 0.875037 | 2.513507 | -1.841515 |
| N | 0.118291 | 3.775625 | 0.098616 |
| N | 0.789789 | 4.953357 | -1.922902 |
| B | -0.301369 | -5.024267 | -0.577264 |
| B | -0.391815 | -2.502474 | -0.493193 |
| B | -1.082204 | -3.719524 | -2.571811 |
| B | -0.180251 | -1.238005 | 1.692150 |
| B | 0.000000 | 0.000000 | -0.437045 |
| B | 0.180251 | 1.238005 | 1.692150 |
| B | 0.391815 | 2.502474 | -0.493193 |
| B | 1.082204 | 3.719524 | -2.571811 |
| B | 0.301369 | 5.024267 | -0.577264 |
| H | 1.218164 | 7.568585 | -1.427817 |
| H | -1.294930 | 5.380676 | 1.745254 |
| H | 0.603542 | 9.627941 | -0.192000 |
| H | -1.680015 | 7.637873 | 2.694050 |
| H | -0.834164 | 9.909925 | 1.897604 |
| N | 0.000000 | 6.311421 | 0.076274 |
| N | 0.219294 | 8.779401 | 0.197138 |
| N | -1.096358 | 7.627402 | 1.870450 |
| B | 0.520036 | 7.546630 | -0.450974 |
| B | -0.591272 | 8.862385 | 1.367311 |
| B | -0.820299 | 6.370605 | 1.258533 |
| H | -1.218164 | -7.568585 | -1.427817 |
| H | 1.294930 | -5.380676 | 1.745254 |
| H | -0.603542 | -9.627941 | -0.192000 |
| H | 1.680015 | -7.637873 | 2.694050 |
| H | 0.834164 | -9.909925 | 1.897604 |
| N | 0.000000 | -6.311421 | 0.076274 |
| N | -0.219294 | -8.779401 | 0.197138 |
| N | 1.096358 | -7.627402 | 1.870450 |
| B | -0.520036 | -7.546630 | -0.450974 |
| B | 0.820299 | -6.370605 | 1.258533 |
| B | 0.591272 | -8.862385 | 1.367311 |

**Supplementary Table 42 |** Nuclear coordinates of S0 geometry of **7f: [6]MP-BN** at the PBE0/6-31G(d) level of theory.

| Element Symbol | (Å) | (Å) | (Å) |
| --- | --- | --- | --- |
| H | 0.294821 | 2.435603 | 0.437463 |
| H | -1.845412 | -1.512352 | -0.427335 |
| H | -4.217545 | 2.368862 | 0.037169 |
| H | -1.991974 | 3.433340 | 0.412682 |
| H | -0.125557 | -2.274279 | 0.427945 |
| H | 1.850629 | 1.324599 | -0.397635 |
| H | 1.993965 | -3.650725 | 0.458968 |
| H | 4.032775 | -2.227509 | 0.006900 |
| H | 3.351347 | 2.166349 | -1.590062 |
| H | 5.696074 | -1.118009 | 0.559962 |
| H | 5.577886 | 3.243437 | -1.921185 |
| H | 7.854105 | 2.501921 | -1.216281 |
| B | -3.188854 | 1.750888 | 0.022528 |
| B | -1.880470 | -0.328541 | -0.226374 |
| B | -0.696341 | 1.788735 | 0.237347 |
| B | 0.641828 | -0.350114 | 0.006844 |
| B | 3.154411 | -0.319153 | -0.231204 |
| B | 1.959753 | -2.468247 | 0.255430 |
| B | 4.374236 | 1.685644 | -1.186503 |
| B | 5.667748 | -0.073842 | -0.033333 |
| B | 6.861196 | 1.868322 | -0.985403 |
| N | -3.154991 | 0.335851 | -0.227420 |
| N | -0.645407 | 0.370774 | 0.006046 |
| N | -1.962200 | 2.438381 | 0.243548 |
| N | 0.723490 | -1.760039 | 0.246161 |
| N | 1.879475 | 0.329802 | -0.226636 |
| N | 3.154949 | -1.729882 | 0.015538 |
| N | 4.400108 | 0.431616 | -0.484090 |
| N | 5.601895 | 2.366330 | -1.421581 |
| N | 6.903657 | 0.623975 | -0.266091 |
| H | 9.435895 | 1.131370 | -1.115918 |
| H | 7.390683 | -1.159843 | 1.735902 |
| H | 11.720239 | 0.319309 | -0.419088 |
| H | 9.482740 | -2.196286 | 2.691788 |
| H | 11.562810 | -1.345759 | 1.498637 |
| B | 8.184279 | 0.079170 | 0.221189 |
| B | 10.694185 | -0.034052 | 0.093844 |
| B | 9.474367 | -1.408398 | 1.786395 |
| N | 9.438196 | 0.471018 | -0.352395 |
| N | 10.684985 | -0.975456 | 1.166542 |
| N | 8.250434 | -0.867782 | 1.294850 |
| H | -5.694784 | 0.945848 | 0.463283 |
| H | -3.526551 | -2.036927 | -1.522268 |
| H | -5.564350 | -3.443707 | -2.030224 |
| H | -7.674168 | -2.379314 | -1.138648 |
| B | -4.399510 | -0.418029 | -0.478995 |
| B | -6.906459 | -0.617641 | -0.256254 |
| B | -5.595299 | -2.400735 | -1.436265 |
| N | -5.669264 | 0.068613 | -0.036000 |
| N | -4.400831 | -1.666462 | -1.180841 |
| N | -6.826388 | -1.859880 | -0.966732 |
| H | -9.478243 | -1.416400 | -1.142685 |
| H | -7.228846 | 1.401675 | 1.715936 |
| H | -11.529812 | -0.383795 | -0.210050 |
| H | -9.484104 | 2.179675 | 2.387452 |
| H | -11.781185 | 1.433865 | 1.563544 |
| B | -8.232266 | 0.955902 | 1.229511 |
| B | -10.735958 | 0.994400 | 1.173861 |
| B | -9.440494 | -0.564352 | -0.297321 |
| N | -8.190445 | -0.075757 | 0.225377 |
| N | -9.486478 | 1.461754 | 1.677778 |
| N | -10.670214 | -0.025819 | 0.179839 |

**Supplementary Table 43 |** Nuclear coordinates of S0 geometry of **8a: B12N12-fullerene** at the PBE0/6-31G(d) level of theory.

| Element Symbol | (Å) | (Å) | (Å) |
| --- | --- | --- | --- |
| N | 0.000000 | -2.122559 | 1.122921 |
| N | 2.122559 | -1.122921 | 0.000000 |
| N | 0.000000 | -2.122559 | -1.122921 |
| N | 2.122559 | 1.122921 | 0.000000 |
| N | 1.122921 | 0.000000 | -2.122559 |
| N | 0.000000 | 2.122559 | -1.122921 |
| N | 0.000000 | 2.122559 | 1.122921 |
| N | 1.122921 | 0.000000 | 2.122559 |
| N | -2.122559 | -1.122921 | 0.000000 |
| N | -2.122559 | 1.122921 | 0.000000 |
| N | -1.122921 | 0.000000 | 2.122559 |
| N | -1.122921 | 0.000000 | -2.122559 |
| B | 0.000000 | -0.951953 | 1.955961 |
| B | 1.955961 | 0.000000 | 0.951953 |
| B | 0.000000 | 0.951953 | 1.955961 |
| B | -1.955961 | 0.000000 | 0.951953 |
| B | 0.951953 | 1.955961 | 0.000000 |
| B | -0.951953 | 1.955961 | 0.000000 |
| B | 0.000000 | 0.951953 | -1.955961 |
| B | -1.955961 | 0.000000 | -0.951953 |
| B | 1.955961 | 0.000000 | -0.951953 |
| B | 0.000000 | -0.951953 | -1.955961 |
| B | -0.951953 | -1.955961 | 0.000000 |
| B | 0.951953 | -1.955961 | 0.000000 |

**Supplementary Table 44 |** Nuclear coordinates of S0 geometry of **8b: B24N24-fullerene** at the PBE0/6-31G(d) level of theory.

| Element Symbol | (Å) | (Å) | (Å) |
| --- | --- | --- | --- |
| B | -1.716159 | 0.685108 | 2.682756 |
| B | 0.685108 | 1.716159 | 2.682756 |
| B | 1.716159 | -0.685108 | 2.682756 |
| B | -0.685108 | -1.716159 | 2.682756 |
| B | -0.685108 | 2.682756 | 1.716159 |
| B | 1.716159 | 2.682756 | 0.685108 |
| B | 2.682756 | 0.685108 | 1.716159 |
| B | 2.682756 | -1.716159 | 0.685108 |
| B | 0.685108 | -2.682756 | 1.716159 |
| B | -1.716159 | -2.682756 | 0.685108 |
| B | -2.682756 | -0.685108 | 1.716159 |
| B | -2.682756 | 1.716159 | 0.685108 |
| B | 2.682756 | 1.716159 | -0.685108 |
| B | 2.682756 | -0.685108 | -1.716159 |
| B | 1.716159 | -2.682756 | -0.685108 |
| B | -0.685108 | -2.682756 | -1.716159 |
| B | 0.685108 | -1.716159 | -2.682756 |
| B | 1.716159 | 0.685108 | -2.682756 |
| B | 0.685108 | 2.682756 | -1.716159 |
| B | -0.685108 | 1.716159 | -2.682756 |
| B | -1.716159 | -0.685108 | -2.682756 |
| B | -2.682756 | 0.685108 | -1.716159 |
| B | -2.682756 | -1.716159 | -0.685108 |
| B | -1.716159 | 2.682756 | -0.685108 |
| N | -2.853303 | 1.725917 | -0.769227 |
| N | -1.725917 | 2.853303 | 0.769227 |
| N | -0.769227 | 2.853303 | -1.725917 |
| N | 0.769227 | -2.853303 | -1.725917 |
| N | 1.725917 | 2.853303 | -0.769227 |
| N | 0.769227 | 2.853303 | 1.725917 |
| N | 1.725917 | -2.853303 | 0.769227 |
| N | 1.725917 | 0.769227 | 2.853303 |
| N | 2.853303 | -0.769227 | 1.725917 |
| N | 2.853303 | 1.725917 | 0.769227 |
| N | 2.853303 | 0.769227 | -1.725917 |
| N | 1.725917 | -0.769227 | -2.853303 |
| N | 0.769227 | 1.725917 | -2.853303 |
| N | -1.725917 | 0.769227 | -2.853303 |
| N | -2.853303 | -0.769227 | -1.725917 |
| N | -2.853303 | -1.725917 | 0.769227 |
| N | -2.853303 | 0.769227 | 1.725917 |
| N | -1.725917 | -2.853303 | -0.769227 |
| N | -1.725917 | -0.769227 | 2.853303 |
| N | -0.769227 | 1.725917 | 2.853303 |
| N | -0.769227 | -2.853303 | 1.725917 |
| N | 0.769227 | -1.725917 | 2.853303 |
| N | 2.853303 | -1.725917 | -0.769227 |
| N | -0.769227 | -1.725917 | -2.853303 |

**Supplementary Table 45 |** Nuclear coordinates of S0 geometry of **8c: B36N36-fullerene** at the PBE0/6-31G(d) level of theory.

| Element Symbol | (Å) | (Å) | (Å) |
| --- | --- | --- | --- |
| B | -0.645776 | -0.645776 | 4.091662 |
| B | 0.645776 | 0.645776 | 4.091662 |
| B | -1.432900 | 1.432900 | 3.202172 |
| B | -1.432900 | 3.202172 | 1.432900 |
| B | 0.645776 | 4.091662 | 0.645776 |
| B | 0.712192 | 2.483859 | 2.483859 |
| B | 2.483859 | 0.712192 | 2.483859 |
| B | 1.432900 | -1.432900 | 3.202172 |
| B | 3.202172 | -1.432900 | 1.432900 |
| B | 4.091662 | 0.645776 | 0.645776 |
| B | 2.483859 | 2.483859 | 0.712192 |
| B | 1.432900 | -3.202172 | 1.432900 |
| B | -0.645776 | -4.091662 | 0.645776 |
| B | -0.712192 | -2.483859 | 2.483859 |
| B | -2.483859 | -2.483859 | 0.712192 |
| B | -2.483859 | -0.712192 | 2.483859 |
| B | -4.091662 | -0.645776 | 0.645776 |
| B | -3.202172 | 1.432900 | 1.432900 |
| B | -4.091662 | 0.645776 | -0.645776 |
| B | -2.483859 | 2.483859 | -0.712192 |
| B | -0.645776 | 4.091662 | -0.645776 |
| B | 1.432900 | 3.202172 | -1.432900 |
| B | -0.712192 | 2.483859 | -2.483859 |
| B | -2.483859 | 0.712192 | -2.483859 |
| B | -3.202172 | -1.432900 | -1.432900 |
| B | -1.432900 | -1.432900 | -3.202172 |
| B | -1.432900 | -3.202172 | -1.432900 |
| B | 0.645776 | -4.091662 | -0.645776 |
| B | 0.712192 | -2.483859 | -2.483859 |
| B | 0.645776 | -0.645776 | -4.091662 |
| B | -0.645776 | 0.645776 | -4.091662 |
| B | 1.432900 | 1.432900 | -3.202172 |
| B | 3.202172 | 1.432900 | -1.432900 |
| B | 2.483859 | -0.712192 | -2.483859 |
| B | 2.483859 | -2.483859 | -0.712192 |
| B | 4.091662 | -0.645776 | -0.645776 |
| N | -1.431092 | 3.199064 | -1.431092 |
| N | 0.759343 | 2.558516 | -2.558516 |
| N | -1.431092 | 1.431092 | -3.199064 |
| N | -3.199064 | 1.431092 | -1.431092 |
| N | -2.558516 | 2.558516 | 0.759343 |
| N | -0.789970 | 4.310153 | 0.789970 |
| N | -0.759343 | 2.558516 | 2.558516 |
| N | -4.310153 | 0.789970 | 0.789970 |
| N | -1.431092 | -3.199064 | 1.431092 |
| N | -3.199064 | -1.431092 | 1.431092 |
| N | -4.310153 | -0.789970 | -0.789970 |
| N | -2.558516 | -0.759343 | -2.558516 |
| N | 0.789970 | -4.310153 | 0.789970 |
| N | -0.789970 | -0.789970 | -4.310153 |
| N | 0.789970 | 0.789970 | -4.310153 |
| N | 1.431092 | -1.431092 | -3.199064 |
| N | 1.431092 | -3.199064 | -1.431092 |
| N | -0.759343 | -2.558516 | -2.558516 |
| N | -0.789970 | -4.310153 | -0.789970 |
| N | -2.558516 | -2.558516 | -0.759343 |
| N | 2.558516 | -2.558516 | 0.759343 |
| N | 0.759343 | -2.558516 | 2.558516 |
| N | -2.558516 | 0.759343 | 2.558516 |
| N | -0.789970 | 0.789970 | 4.310153 |
| N | -1.431092 | -1.431092 | 3.199064 |
| N | 0.789970 | -0.789970 | 4.310153 |
| N | 1.431092 | 1.431092 | 3.199064 |
| N | 2.558516 | -0.759343 | 2.558516 |
| N | 3.199064 | 1.431092 | 1.431092 |
| N | 4.310153 | -0.789970 | 0.789970 |
| N | 4.310153 | 0.789970 | -0.789970 |
| N | 3.199064 | -1.431092 | -1.431092 |
| N | 2.558516 | 2.558516 | -0.759343 |
| N | 2.558516 | 0.759343 | -2.558516 |
| N | 0.789970 | 4.310153 | -0.789970 |
| N | 1.431092 | 3.199064 | 1.431092 |

**Supplementary Table 46 |** Nuclear coordinates of S0 geometry of **9: ben-BS** at the PBE0/6-31G(d) level of theory.

| Element Symbol | (Å) | (Å) | (Å) |
| --- | --- | --- | --- |
| S | -1.634315 | 0.943572 | 0.000000 |
| S | 1.634315 | 0.943572 | 0.000000 |
| S | 0.000000 | -1.887144 | 0.000000 |
| B | 0.000000 | 1.700963 | 0.000000 |
| H | 0.000000 | 2.893645 | 0.000000 |
| B | -1.473077 | -0.850482 | 0.000000 |
| H | -2.505970 | -1.446822 | 0.000000 |
| B | 1.473077 | -0.850482 | 0.000000 |
| H | 2.505970 | -1.446822 | 0.000000 |

**Supplementary Table 47 |** Nuclear coordinates of S0 geometry of **10: ben-BSe** at the PBE0/6-31G(d) level of theory.

| Element Symbol | (Å) | (Å) | (Å) |
| --- | --- | --- | --- |
| Se | -1.744646 | 1.007272 | 0.000000 |
| Se | 1.744646 | 1.007272 | 0.000000 |
| Se | 0.000000 | -2.014543 | 0.000000 |
| B | 0.000000 | 1.797228 | 0.000000 |
| H | 0.000000 | 2.990142 | 0.000000 |
| B | -1.556445 | -0.898614 | 0.000000 |
| H | -2.589539 | -1.495071 | 0.000000 |
| B | 1.556445 | -0.898614 | 0.000000 |
| H | 2.589539 | -1.495071 | 0.000000 |

**Supplementary Table 48 |** Nuclear coordinates of S0 geometry of **11: ben-BO** at the PBE0/6-31G(d) level of theory.

| Element Symbol | (Å) | (Å) | (Å) |
| --- | --- | --- | --- |
| O | 0.000000 | 1.372903 | 0.000000 |
| O | 1.188969 | -0.686451 | 0.000000 |
| O | -1.188969 | -0.686451 | 0.000000 |
| B | 1.189344 | 0.686668 | 0.000000 |
| H | 2.221725 | 1.282713 | 0.000000 |
| B | -1.189344 | 0.686668 | 0.000000 |
| H | -2.221725 | 1.282713 | 0.000000 |
| B | 0.000000 | -1.373336 | 0.000000 |
| H | 0.000000 | -2.565427 | 0.000000 |

**Supplementary Table 49 |** Nuclear coordinates of S0 geometry of **12: ben-GaN** at the PBE0/6-31G(d) level of theory.

| Element Symbol | (Å) | (Å) | (Å) |
| --- | --- | --- | --- |
| N | 0.000000 | 1.772453 | 0.000000 |
| H | 0.000000 | 2.786042 | 0.000000 |
| N | 1.534989 | -0.886227 | 0.000000 |
| H | 2.412783 | -1.393021 | 0.000000 |
| N | -1.534989 | -0.886227 | 0.000000 |
| H | -2.412783 | -1.393021 | 0.000000 |
| H | 2.984445 | 1.723070 | 0.000000 |
| H | -2.984445 | 1.723070 | 0.000000 |
| H | 0.000000 | -3.446141 | 0.000000 |
| Ga | -1.640907 | 0.947378 | 0.000000 |
| Ga | 0.000000 | -1.894756 | 0.000000 |
| Ga | 1.640907 | 0.947378 | 0.000000 |

**Supplementary Table 50 |** Nuclear coordinates of S0 geometry of **13: prism-GaN** at the PBE0/6-31G(d) level of theory.

| Element Symbol | (Å) | (Å) | (Å) |
| --- | --- | --- | --- |
| H | -1.210354 | 1.895099 | 1.120418 |
| H | -0.517124 | -1.163737 | -2.684268 |
| H | 1.881855 | -1.310704 | 0.000000 |
| H | -0.517124 | -1.163737 | 2.684268 |
| H | 2.232208 | 2.378104 | 0.000000 |
| H | -1.210354 | 1.895099 | -1.120418 |
| Ga | -0.607977 | -0.834382 | 1.155810 |
| Ga | -0.607977 | -0.834382 | -1.155810 |
| Ga | 1.219467 | 1.210072 | 0.000000 |
| N | 1.106241 | -0.658325 | 0.000000 |
| N | -0.607977 | 1.164114 | -0.756670 |
| N | -0.607977 | 1.164114 | 0.756670 |

**Supplementary Table 51 |** Nuclear coordinates of S0 geometry of **14: ben-B4N2** at the PBE0/6-31G(d) level of theory.

| Element Symbol | (Å) | (Å) | (Å) |
| --- | --- | --- | --- |
| H | 0.000000 | 2.247250 | 1.545980 |
| H | 0.000000 | -2.247250 | 1.545980 |
| N | 0.000000 | 0.000000 | -1.546204 |
| H | 0.000000 | 0.000000 | -2.561292 |
| H | 0.000000 | 0.000000 | 2.561292 |
| H | 0.000000 | 2.247250 | -1.545980 |
| B | 0.000000 | -1.254354 | -0.864431 |
| H | 0.000000 | -2.247250 | -1.545980 |
| B | 0.000000 | 1.254354 | -0.864431 |
| B | 0.000000 | 1.254354 | 0.864431 |
| B | 0.000000 | -1.254354 | 0.864431 |
| N | 0.000000 | 0.000000 | 1.546204 |

**Supplementary Table 52 |** Nuclear coordinates of S0 geometry of **15: ben-BP** at the PBE0/6-31G(d) level of theory.

| Element Symbol | (Å) | (Å) | (Å) |
| --- | --- | --- | --- |
| B | 1.615714 | 0.932833 | 0.094697 |
| H | 2.645063 | 1.527128 | 0.186565 |
| B | 0.000000 | -1.865666 | 0.094697 |
| H | 0.000000 | -3.054256 | 0.186565 |
| B | -1.615714 | 0.932833 | 0.094697 |
| H | -2.645063 | 1.527128 | 0.186565 |
| H | 2.746172 | -1.585503 | 0.238368 |
| H | 0.000000 | 3.171006 | 0.238368 |
| H | -2.746172 | -1.585503 | 0.238368 |
| P | 0.000000 | 1.799659 | -0.059894 |
| P | -1.558550 | -0.899829 | -0.059894 |
| P | 1.558550 | -0.899829 | -0.059894 |

**Supplementary Table 53 |** Nuclear coordinates of S0 geometry of **16: ben-NP** at the PBE0/6-31G(d) level of theory.

| Element Symbol | (Å) | (Å) | (Å) |
| --- | --- | --- | --- |
| H | 2.181815 | 1.259672 | 1.086871 |
| H | 2.181815 | 1.259672 | -1.086871 |
| H | -2.181815 | 1.259672 | 1.086871 |
| H | -2.181815 | 1.259672 | -1.086871 |
| H | 0.000000 | -2.519343 | 1.086871 |
| H | 0.000000 | -2.519343 | -1.086871 |
| P | 1.401566 | 0.809195 | 0.000000 |
| P | -1.401566 | 0.809195 | 0.000000 |
| P | 0.000000 | -1.618389 | 0.000000 |
| N | 0.000000 | 1.601164 | 0.000000 |
| N | -1.386649 | -0.800582 | 0.000000 |
| N | 1.386649 | -0.800582 | 0.000000 |

**Supplementary Table 54 |** Nuclear coordinates of S0 geometry of **17: ring-Ga3P3** at the PBE0/6-31G(d) level of theory.

| Element Symbol | (Å) | (Å) | (Å) |
| --- | --- | --- | --- |
| H | -2.802357 | -1.617941 | -1.144840 |
| H | -2.846120 | 1.643208 | -0.359599 |
| H | 0.000000 | 3.235883 | -1.144840 |
| H | 0.000000 | -3.286417 | -0.359599 |
| H | 2.802357 | -1.617941 | -1.144840 |
| H | 2.846120 | 1.643208 | -0.359599 |
| Ga | 0.000000 | 1.964182 | -0.242233 |
| Ga | 1.701031 | -0.982091 | -0.242233 |
| Ga | -1.701031 | -0.982091 | -0.242233 |
| P | 1.938163 | 1.118999 | 0.600910 |
| P | 0.000000 | -2.237998 | 0.600910 |
| P | -1.938163 | 1.118999 | 0.600910 |

**Supplementary Table 55 |** Nuclear coordinates of S0 geometry of **18: ben-AlN** at the PBE0/6-31G(d) level of theory.

| Element Symbol | (Å) | (Å) | (Å) |
| --- | --- | --- | --- |
| N | 0.000000 | 1.749891 | 0.000000 |
| H | 0.000000 | 2.764834 | 0.000000 |
| N | 1.515450 | -0.874946 | 0.000000 |
| H | 2.394417 | -1.382417 | 0.000000 |
| N | -1.515450 | -0.874946 | 0.000000 |
| H | -2.394417 | -1.382417 | 0.000000 |
| H | 2.972508 | 1.716178 | 0.000000 |
| H | -2.972508 | 1.716178 | 0.000000 |
| H | 0.000000 | -3.432356 | 0.000000 |
| Al | -1.594717 | 0.920710 | 0.000000 |
| Al | 0.000000 | -1.841420 | 0.000000 |
| Al | 1.594717 | 0.920710 | 0.000000 |

**Supplementary Table 56 |** Nuclear coordinates of S0 geometry of **19: ring-Al3P3** at the PBE0/6-31G(d) level of theory.

| Element Symbol | (Å) | (Å) | (Å) |
| --- | --- | --- | --- |
| P | 0.257968 | 2.167389 | 0.000000 |
| Al | -0.314228 | 1.026741 | 1.900085 |
| P | -0.314228 | -1.281983 | -1.907960 |
| Al | -0.314228 | 1.026741 | -1.900085 |
| P | -0.314228 | -1.281983 | 1.907960 |
| Al | 0.906056 | -1.720434 | 0.000000 |
| H | -0.596443 | 1.836284 | 3.238726 |
| H | -0.452338 | 3.392746 | 0.000000 |
| H | -0.596443 | 1.836284 | -3.238726 |
| H | 0.652609 | -1.469144 | -2.935004 |
| H | 2.288543 | -2.508017 | 0.000000 |
| H | 0.652609 | -1.469144 | 2.935004 |

**Supplementary Table 57 |** Nuclear coordinates of S0 geometry of **20: ring-Al3As3** at the PBE0/6-31G(d) level of theory.

| Element Symbol | (Å) | (Å) | (Å) |
| --- | --- | --- | --- |
| As | 0.481823 | 2.261790 | 0.000000 |
| Al | -0.335643 | 1.094129 | 1.887562 |
| As | -0.335643 | -1.296176 | -1.972679 |
| Al | -0.335643 | 1.094129 | -1.887562 |
| As | -0.335643 | -1.296176 | 1.972679 |
| Al | 0.976372 | -1.553078 | 0.000000 |
| H | -0.744828 | 1.933618 | 3.177084 |
| H | -0.320765 | 3.561474 | 0.000000 |
| H | -0.744828 | 1.933618 | -3.177084 |
| H | 0.810281 | -1.343115 | -2.992892 |
| H | 2.476016 | -2.091242 | 0.000000 |
| H | 0.810281 | -1.343115 | 2.992892 |

**Supplementary Table 58 |** Nuclear coordinates of S0 geometry of **21: ring-(Si(N2CH3))3P3** at the PBE0/6-31G(d) level of theory.

| Element Symbol | (Å) | (Å) | (Å) |
| --- | --- | --- | --- |
| P | 2.089301 | 0.747089 | 0.000000 |
| P | -1.156951 | -0.481899 | 1.996859 |
| P | -1.156951 | -0.481899 | -1.996859 |
| Si | 0.915371 | 0.015028 | -1.661801 |
| Si | 0.915371 | 0.015028 | 1.661801 |
| Si | -1.896474 | -0.110784 | 0.000000 |
| C | 2.207828 | -0.120826 | -3.623701 |
| C | 2.207828 | -0.120826 | 3.623701 |
| C | -4.164405 | 0.498178 | 0.000000 |
| H | 1.759988 | 1.893348 | 3.497605 |
| H | 2.814112 | -0.171751 | 4.529539 |
| H | 2.165890 | -2.085413 | 2.992787 |
| H | 2.814112 | -0.171751 | -4.529539 |
| H | 2.165890 | -2.085413 | -2.992787 |
| H | 1.759988 | 1.893348 | -3.497605 |
| H | -3.251715 | 2.345411 | 0.000000 |
| H | -5.225730 | 0.751748 | 0.000000 |
| H | -4.209246 | -1.574781 | 0.000000 |
| N | 1.931693 | -1.121841 | 2.818367 |
| N | 1.625472 | 0.959960 | 3.145359 |
| N | -3.668414 | -0.726518 | 0.000000 |
| N | -3.161849 | 1.342700 | 0.000000 |
| N | 1.931693 | -1.121841 | -2.818367 |
| N | 1.625472 | 0.959960 | -3.145359 |

**Supplementary Table 59 |** Nuclear coordinates of S0 geometry of **22: ring-(Si(N2CH3))3As3** at the PBE0/6-31G(d) level of theory.

| Element Symbol | (Å) | (Å) | (Å) |
| --- | --- | --- | --- |
| As | 0.000124 | -2.439831 | 0.000000 |
| As | 0.000104 | 1.220059 | 2.113118 |
| As | 0.000104 | 1.220059 | -2.113118 |
| Si | -0.000065 | -0.983376 | -1.703481 |
| Si | -0.000065 | -0.983376 | 1.703481 |
| Si | 0.000109 | 1.966832 | 0.000000 |
| C | -0.000168 | -2.165965 | -3.750706 |
| C | -0.000168 | -2.165965 | 3.750706 |
| C | -0.000179 | 4.331122 | 0.000000 |
| H | 2.016741 | -1.940422 | 3.360149 |
| H | -0.000230 | -2.712065 | 4.695534 |
| H | -2.017008 | -1.940579 | 3.360070 |
| H | -0.000230 | -2.712065 | -4.695534 |
| H | -2.017008 | -1.940579 | -3.360070 |
| H | 2.016741 | -1.940422 | -3.360149 |
| H | 2.016713 | 3.880252 | 0.000000 |
| H | -0.000179 | 5.422418 | 0.000000 |
| H | -2.016994 | 3.880225 | 0.000000 |
| N | -1.063617 | -1.778560 | 3.080702 |
| N | 1.063321 | -1.778859 | 3.080629 |
| N | -1.063622 | 3.557217 | 0.000000 |
| N | 1.063336 | 3.557264 | 0.000000 |
| N | -1.063617 | -1.778560 | -3.080702 |
| N | 1.063321 | -1.778859 | -3.080629 |

**Supplementary Table 60 |** Nuclear coordinates of S0 geometry of **23: ring-Ge3N3** at the PBE0/6-31G(d) level of theory.

| Element Symbol | (Å) | (Å) | (Å) |
| --- | --- | --- | --- |
| N | 0.000000 | 1.630021 | 0.000000 |
| Ge | -1.739785 | 1.004465 | 0.000000 |
| N | -1.411640 | -0.815011 | 0.000000 |
| Ge | 0.000000 | -2.008931 | 0.000000 |
| N | 1.411640 | -0.815011 | 0.000000 |
| Ge | 1.739785 | 1.004465 | 0.000000 |
| H | 0.000000 | 2.647731 | 0.000000 |
| H | -2.293002 | -1.323865 | 0.000000 |
| H | 2.293002 | -1.323865 | 0.000000 |
